# Supplementary material
Source: PubMed Central journal article supplement (PMC3387396)
Supplement: supp_jc.2011-3478_11-3478_supp_tabs.pdf [file supp_jc.2011-3478_11-3478_supp_tabs.pdf]

**Supplementary Table 1:** Defining clinical, biochemical and ultrasound criteria of women with PCOS in contributing cohorts. Abbreviations: IM irregular menses; HA hyperandrogenism; PCOM polycystic ovary morphology; T testosterone; FT free testosterone; AD androstenedione; NA not available. To convert to SI units, multiply testosterone by 0.0347 and androstenedione by 3.492.

| Cohort        | IM            | Clinical HA    | Biochemical HA |               |            | PCOM                                     |
|---------------|---------------|----------------|----------------|---------------|------------|------------------------------------------|
|               |               |                | T              | FT            | AD         |                                          |
| Iceland (1,2) | < 9 menses/yr | FG > 6 or acne | > 63 ng/dL     | NA            | >3.8 ng/mL | ≥ 10 follicles 2-10 mm or > 10 cc volume |
| Boston (1,2)  | < 9 menses/yr | FG > 9 or acne | > 63 ng/dL     | NA            | >3.8 ng/mL | ≥ 10 follicles 2-10 mm or > 10 cc volume |
| Chicago (3)   | < 9 menses/yr | FG ≥ 9         | NA             | ≥ 21.8 pmol/L | NA         | NA                                       |

**Supplementary Table 2:** Number of subjects with PCOS and controls who manifested one of the Rotterdam criteria for PCOS and the number who fulfilled the Rotterdam or NIH criteria for PCOS. Abbreviations: IM irregular menses; HA hyperandrogenism; PCOM polycystic ovary morphology; NA not available.

| Cohort  | Subject Group         | # IM | # HA  | # PCOM           | # Rotterdam | # NIH |
|---------|-----------------------|------|-------|------------------|-------------|-------|
| Iceland | PCOS                  | 404  | 1,348 | 554              | 684         | 376   |
|         | Controls <sup>1</sup> | NA   | NA    | NA               | NA          | NA    |
| Boston  | PCOS                  | 565  | 608   | 575              | 591         | 565   |
|         | Controls              | 0    | 0     | 145 <sup>2</sup> | 0           | 0     |
| Chicago | PCOS                  | 203  | 203   | NA               | 203         | 203   |
|         | Controls              | NA   | NA    | NA               | NA          | NA    |

<sup>1</sup> Control subjects did not report features of PCOS and were not affected participants in the PCOS study.

<sup>2</sup> A total of 332 controls had an ultrasound.

**Supplementary Table 3.** Odds ratios (OR) and *P* values for the association of PCOS with seven SNPs identified in a genome-wide association study of Chinese women, with no adjustment and adjusted for BMI and age in Iceland and Boston sample sets combined using a Mantel-Haenszel model. The association *P* values are two sided and adjusted for genomic controls in Iceland ( $\lambda = 1.16$ ).

| SNP        | No adjustment |          | Adjusted for age and BMI |          |
|------------|---------------|----------|--------------------------|----------|
|            | OR            | <i>P</i> | OR                       | <i>P</i> |
| rs13405728 | 1.14          | 0.40     | 1.18                     | 0.30     |
| rs12468394 | 1.09          | 0.17     | 1.11                     | 0.14     |
| rs13429458 | 1.11          | 0.32     | 1.14                     | 0.24     |
| rs12478601 | 1.11          | 0.12     | 1.08                     | 0.29     |
| rs10818854 | 1.53          | 0.00019  | 1.68                     | 0.0013   |
| rs2479106  | 1.08          | 0.26     | 1.07                     | 0.39     |
| rs10986105 | 1.85          | 0.00098  | 1.94                     | 0.00013  |

The analysis of the Icelandic samples was restricted to the 13,585 out of 16,976 controls that had BMI available. All the 376 Icelandic PCOS cases had BMI information.

**Supplementary Table 4.** Hormone levels as a function of genotype at all seven PCOS risk variants, previously identified in Han Chinese women (5), in women of European ancestry in the combined sample sets from Iceland and Boston. Phenotype data from Chicago subjects was not available. Linear regression using an additive genetic model was used to test for association of PCOS risk variants with 22 log-transformed quantitative traits in PCOS cases and controls. Results were adjusted for age and BMI (Boston) and age only (Iceland) and were meta-analyzed using a fixed effects inverse-variance model. Results are reported as  $P_{\text{nominal}}$  values. rs13429458 was analyzed only in the Icelandic cohort. A  $p$  value  $< 3.2 \times 10^{-4}$  was considered significant after Bonferroni correction for 22 traits and 7 SNPs and significant values are highlighted in bold.

| SNP               | Trait               | Effect/other allele | N           | Beta         | SE           | $P_{\text{nominal}}$ | Direction | $P_{\text{heterogeneity}}$ |
|-------------------|---------------------|---------------------|-------------|--------------|--------------|----------------------|-----------|----------------------------|
| <b>rs12468394</b> | <b>Testosterone</b> | <b>a/c</b>          | <b>1455</b> | <b>0.067</b> | <b>0.015</b> | <b>9.91E-06</b>      | <b>++</b> | <b>0.440</b>               |
| rs13429458        | Testosterone        | a/c                 | 905         | -0.043       | 0.039        | 0.270                | -?        | -                          |
| rs12478601        | Testosterone        | t/c                 | 1455        | 0.007        | 0.046        | 0.877                | ++        | 0.963                      |
| rs13405728        | Testosterone        | a/g                 | 1462        | -0.043       | 0.025        | 0.086                | --        | 0.317                      |
| rs10818854        | Testosterone        | a/g                 | 1463        | -0.014       | 0.031        | 0.660                | +-        | 0.145                      |
| rs2479106         | Testosterone        | a/g                 | 1464        | 0.019        | 0.013        | 0.159                | ++        | 0.941                      |
| rs10986105        | Testosterone        | t/g                 | 1463        | 0.028        | 0.039        | 0.481                | -+        | 0.986                      |
| rs12468394        | Androstenedione     | a/c                 | 1412        | 0.018        | 0.012        | 0.128                | ++        | 0.070                      |
| rs13429458        | Androstenedione     | a/c                 | 905         | -0.044       | 0.026        | 0.091                | -?        | -                          |
| rs12478601        | Androstenedione     | t/c                 | 1412        | -0.004       | 0.027        | 0.875                | +-        | 0.014                      |
| rs13405728        | Androstenedione     | a/g                 | 1417        | -0.024       | 0.019        | 0.202                | --        | 0.181                      |
| rs10818854        | Androstenedione     | a/g                 | 1418        | -0.011       | 0.025        | 0.659                | +-        | 0.539                      |
| rs2479106         | Androstenedione     | a/g                 | 1419        | 0.017        | 0.008        | 0.041                | ++        | 0.566                      |
| rs10986105        | Androstenedione     | t/g                 | 1418        | 0.041        | 0.031        | 0.186                | -+        | 0.374                      |
| rs12468394        | DHEAS               | a/c                 | 1460        | -0.021       | 0.016        | 0.193                | +-        | 0.315                      |
| rs13429458        | DHEAS               | a/c                 | 905         | -0.056       | 0.038        | 0.141                | -?        | -                          |
| rs12478601        | DHEAS               | t/c                 | 1460        | 0.008        | 0.036        | 0.829                | +-        | 0.126                      |
| rs13405728        | DHEAS               | a/g                 | 1467        | -0.008       | 0.025        | 0.739                | -+        | 0.035                      |
| rs10818854        | DHEAS               | a/g                 | 1468        | 0.017        | 0.032        | 0.589                | ++        | 0.965                      |
| rs2479106         | DHEAS               | a/g                 | 1469        | -0.007       | 0.016        | 0.644                | --        | 0.969                      |

|            |                    |     |      |        |       |       |    |       |
|------------|--------------------|-----|------|--------|-------|-------|----|-------|
| rs10986105 | DHEAS              | t/g | 1468 | -0.019 | 0.038 | 0.620 | -- | 0.571 |
| rs12468394 | 17 OH-progesterone | a/c | 904  | 0.054  | 0.028 | 0.052 | ++ | 0.263 |
| rs13429458 | 17 OH-progesterone | a/c | 904  | -0.054 | 0.039 | 0.166 | -? | -     |
| rs12478601 | 17 OH-progesterone | t/c | 904  | 0.034  | 0.067 | 0.611 | ++ | 0.794 |
| rs13405728 | 17 OH-progesterone | a/g | 905  | 0.003  | 0.027 | 0.911 | +- | 0.111 |
| rs10818854 | 17 OH-progesterone | a/g | 906  | 0.097  | 0.082 | 0.238 | ++ | 0.616 |
| rs2479106  | 17 OH-progesterone | a/g | 907  | 0.011  | 0.012 | 0.333 | +- | 0.223 |
| rs10986105 | 17 OH-progesterone | t/g | 907  | -0.046 | 0.244 | 0.849 | +- | 0.302 |
| rs12468394 | Progesterone       | a/c | 891  | 0.024  | 0.065 | 0.712 | +- | 0.517 |
| rs13429458 | Progesterone       | a/c | 891  | -0.040 | 0.065 | 0.538 | -? | -     |
| rs12478601 | Progesterone       | t/c | 891  | -0.023 | 0.037 | 0.540 | +- | 0.474 |
| rs13405728 | Progesterone       | a/g | 892  | -0.004 | 0.103 | 0.972 | +- | 0.600 |
| rs10818854 | Progesterone       | a/g | 893  | 0.042  | 0.284 | 0.883 | ++ | 0.938 |
| rs2479106  | Progesterone       | a/g | 894  | 0.020  | 0.022 | 0.360 | +- | 0.539 |
| rs10986105 | Progesterone       | t/g | 894  | -0.223 | 0.353 | 0.527 | -- | 0.990 |
| rs12468394 | SHBG               | a/c | 1454 | 0.034  | 0.015 | 0.022 | +- | 0.068 |
| rs13429458 | SHBG               | a/c | 905  | -0.024 | 0.043 | 0.577 | -? | -     |
| rs12478601 | SHBG               | t/c | 1454 | -0.034 | 0.028 | 0.231 | -- | 0.448 |
| rs13405728 | SHBG               | a/g | 1460 | 0.005  | 0.014 | 0.700 | ++ | 0.558 |
| rs10818854 | SHBG               | a/g | 1461 | 0.033  | 0.027 | 0.210 | +- | 0.030 |
| rs2479106  | SHBG               | a/g | 1462 | -0.030 | 0.013 | 0.023 | -- | 0.925 |
| rs10986105 | SHBG               | t/g | 1461 | -0.047 | 0.032 | 0.140 | -- | 0.046 |
| rs12468394 | LH_FSH             | a/c | 1406 | 0.033  | 0.017 | 0.050 | ++ | 0.790 |
| rs13429458 | LH_FSH             | a/c | 842  | -0.039 | 0.032 | 0.223 | -? | -     |
| rs12478601 | LH_FSH             | t/c | 1406 | -0.035 | 0.048 | 0.461 | +- | 0.831 |
| rs13405728 | LH_FSH             | a/g | 1413 | 0.007  | 0.022 | 0.757 | ++ | 0.846 |
| rs10818854 | LH_FSH             | a/g | 1415 | 0.011  | 0.033 | 0.747 | ++ | 0.287 |
| rs2479106  | LH_FSH             | a/g | 1416 | -0.003 | 0.016 | 0.859 | -- | 0.932 |
| rs10986105 | LH_FSH             | t/g | 1415 | -0.034 | 0.040 | 0.397 | -- | 0.671 |
| rs12468394 | FSH                | a/c | 1407 | 0.005  | 0.010 | 0.613 | +- | 0.891 |
| rs13429458 | FSH                | a/c | 842  | 0.038  | 0.030 | 0.205 | +? | -     |
| rs12478601 | FSH                | t/c | 1407 | -0.011 | 0.016 | 0.512 | +- | 0.260 |

|            |                         |     |      |        |       |       |    |       |
|------------|-------------------------|-----|------|--------|-------|-------|----|-------|
| rs13405728 | FSH                     | a/g | 1414 | 0.018  | 0.017 | 0.273 | +  | 0.460 |
| rs10818854 | FSH                     | a/g | 1416 | 0.004  | 0.019 | 0.833 | +  | 0.280 |
| rs2479106  | FSH                     | a/g | 1417 | 0.006  | 0.008 | 0.388 | ++ | 0.538 |
| rs10986105 | FSH                     | t/g | 1416 | 0.001  | 0.023 | 0.983 | +- | 0.378 |
| rs12468394 | LH                      | a/c | 1406 | 0.007  | 0.010 | 0.525 | +- | 0.047 |
| rs13429458 | LH                      | a/c | 842  | -0.001 | 0.003 | 0.739 | -? | -     |
| rs12478601 | LH                      | t/c | 1406 | 0.006  | 0.007 | 0.356 | +- | 0.518 |
| rs13405728 | LH                      | a/g | 1413 | 0.009  | 0.032 | 0.767 | +  | 0.362 |
| rs10818854 | LH                      | a/g | 1415 | -0.018 | 0.012 | 0.134 | +  | 0.408 |
| rs2479106  | LH                      | a/g | 1416 | -0.004 | 0.006 | 0.450 | +  | 0.714 |
| rs10986105 | LH                      | t/g | 1415 | 0.011  | 0.029 | 0.711 | +- | 0.193 |
| rs12468394 | Prolactin               | a/c | 2040 | -0.016 | 0.012 | 0.181 | +- | 0.172 |
| rs13429458 | Prolactin               | a/c | 1370 | 0.028  | 0.033 | 0.396 | +? | -     |
| rs12478601 | Prolactin               | t/c | 2040 | -0.036 | 0.015 | 0.014 | -- | 0.864 |
| rs13405728 | Prolactin               | a/g | 2050 | 0.018  | 0.021 | 0.389 | ++ | 0.866 |
| rs10818854 | Prolactin               | a/g | 2048 | -0.021 | 0.021 | 0.330 | +  | 0.055 |
| rs2479106  | Prolactin               | a/g | 2048 | 0.009  | 0.011 | 0.390 | +- | 0.088 |
| rs10986105 | Prolactin               | t/g | 2046 | 0.020  | 0.020 | 0.318 | ++ | 0.997 |
| rs12468394 | Maximum Ovarian Volume  | a/c | 1437 | 0.013  | 0.014 | 0.348 | ++ | 0.581 |
| rs13429458 | Maximum Ovarian Volume  | a/c | 855  | -0.029 | 0.035 | 0.407 | -? | -     |
| rs12478601 | Maximum Ovarian Volume  | t/c | 1437 | -0.004 | 0.022 | 0.859 | +- | 0.584 |
| rs13405728 | Maximum Ovarian Volume  | a/g | 1446 | 0.011  | 0.024 | 0.656 | +  | 0.761 |
| rs10818854 | Maximum Ovarian Volume  | a/g | 1444 | -0.021 | 0.024 | 0.383 | -- | 0.939 |
| rs2479106  | Maximum Ovarian Volume  | a/g | 1444 | 0.021  | 0.012 | 0.080 | ++ | 0.206 |
| rs10986105 | Maximum Ovarian Volume  | t/g | 1442 | 0.042  | 0.029 | 0.142 | ++ | 0.600 |
| rs12468394 | Maximum Follicle Number | a/c | 1469 | 0.019  | 0.010 | 0.048 | ++ | 0.983 |
| rs13429458 | Maximum Follicle Number | a/c | 826  | -0.041 | 0.027 | 0.129 | -? | -     |
| rs12478601 | Maximum Follicle Number | t/c | 1469 | -0.005 | 0.008 | 0.535 | +  | 0.585 |
| rs13405728 | Maximum Follicle Number | a/g | 1478 | 0.011  | 0.016 | 0.490 | +  | 0.490 |
| rs10818854 | Maximum Follicle Number | a/g | 1477 | -0.016 | 0.018 | 0.383 | +- | 0.396 |
| rs2479106  | Maximum Follicle Number | a/g | 1477 | 0.012  | 0.008 | 0.161 | +  | 0.438 |
| rs10986105 | Maximum Follicle Number | t/g | 1475 | 0.013  | 0.023 | 0.573 | +  | 0.692 |

|            |                             |     |      |         |        |        |    |        |
|------------|-----------------------------|-----|------|---------|--------|--------|----|--------|
| rs12468394 | Maximum Waist Circumference | a/c | 1987 | 0.003   | 0.002  | 0.202  | -+ | 0.173  |
| rs13429458 | Maximum Waist Circumference | a/c | 1262 | -0.005  | 0.011  | 0.649  | -? | -      |
| rs12478601 | Maximum Waist Circumference | t/c | 1989 | 0.004   | 0.004  | 0.332  | +- | 0.189  |
| rs13405728 | Maximum Waist Circumference | a/g | 2000 | 0.002   | 0.003  | 0.533  | ++ | 0.777  |
| rs10818854 | Maximum Waist Circumference | a/g | 2000 | 0.003   | 0.004  | 0.504  | -+ | 0.894  |
| rs2479106  | Maximum Waist Circumference | a/g | 2001 | 0.000   | 0.002  | 0.882  | ++ | 0.798  |
| rs10986105 | Maximum Waist Circumference | t/g | 1999 | 0.001   | 0.005  | 0.849  | ++ | 0.831  |
| rs12468394 | Maximum Hip Circumference   | a/c | 1984 | 0.002   | 0.002  | 0.316  | -+ | 0.239  |
| rs13429458 | Maximum Hip Circumference   | a/c | 1262 | -0.003  | 0.007  | 0.668  | -? | -      |
| rs12478601 | Maximum Hip Circumference   | t/c | 1986 | 0.006   | 0.003  | 0.049  | ++ | 0.956  |
| rs13405728 | Maximum Hip Circumference   | a/g | 1997 | -0.001  | 0.003  | 0.682  | -- | 0.803  |
| rs10818854 | Maximum Hip Circumference   | a/g | 1997 | -0.001  | 0.003  | 0.774  | +- | 0.541  |
| rs2479106  | Maximum Hip Circumference   | a/g | 1998 | 0.003   | 0.002  | 0.054  | -+ | 0.512  |
| rs10986105 | Maximum Hip Circumference   | t/g | 1996 | 0.003   | 0.003  | 0.348  | -+ | 0.322  |
| rs12468394 | Waist/Hip Circumference     | a/c | 1984 | -0.0009 | 0.0032 | 0.7884 | -+ | 0.3508 |
| rs13429458 | Waist/Hip Circumference     | a/c | 1262 | -0.002  | 0.0068 | 0.77   | -? | 1      |
| rs12478601 | Waist/Hip Circumference     | t/c | 1986 | 0.0014  | 0.0023 | 0.5261 | +- | 0.2163 |
| rs13405728 | Waist/Hip Circumference     | a/g | 1997 | 0.0035  | 0.0033 | 0.2876 | ++ | 0.3701 |
| rs10818854 | Waist/Hip Circumference     | a/g | 1997 | 0.0024  | 0.0039 | 0.5406 | -+ | 0.2899 |
| rs2479106  | Waist/Hip Circumference     | a/g | 1998 | -0.0021 | 0.0018 | 0.2593 | +- | 0.1398 |
| rs10986105 | Waist/Hip Circumference     | t/g | 1996 | -0.0014 | 0.0046 | 0.7664 | +- | 0.2318 |
| rs12468394 | Systolic Blood Pressure     | a/c | 2134 | -0.002  | 0.003  | 0.536  | +- | 0.245  |
| rs13429458 | Systolic Blood Pressure     | a/c | 1263 | -0.005  | 0.009  | 0.579  | -? | -      |
| rs12478601 | Systolic Blood Pressure     | t/c | 2136 | 0.003   | 0.003  | 0.342  | +- | 0.175  |
| rs13405728 | Systolic Blood Pressure     | a/g | 2147 | 0.002   | 0.005  | 0.758  | -+ | 0.169  |
| rs10818854 | Systolic Blood Pressure     | a/g | 2146 | -0.008  | 0.006  | 0.209  | -- | 0.887  |

|            |                          |     |      |         |        |        |    |        |
|------------|--------------------------|-----|------|---------|--------|--------|----|--------|
| rs2479106  | Systolic Blood Pressure  | a/g | 2148 | 0.002   | 0.003  | 0.429  | -+ | 0.020  |
| rs10986105 | Systolic Blood Pressure  | t/g | 2146 | 0.002   | 0.006  | 0.776  | -+ | 0.149  |
| rs12468394 | Diastolic Blood Pressure | a/c | 2133 | 0.003   | 0.003  | 0.309  | ++ | 0.457  |
| rs13429458 | Diastolic Blood Pressure | a/c | 1263 | -0.006  | 0.008  | 0.453  | -? | -      |
| rs12478601 | Diastolic Blood Pressure | t/c | 2135 | 0.010   | 0.004  | 0.009  | +- | 0.016  |
| rs13405728 | Diastolic Blood Pressure | a/g | 2146 | 0.000   | 0.006  | 0.964  | -+ | 0.109  |
| rs10818854 | Diastolic Blood Pressure | a/g | 2145 | -0.003  | 0.006  | 0.555  | +- | 0.102  |
| rs2479106  | Diastolic Blood Pressure | a/g | 2147 | 0.004   | 0.003  | 0.175  | -+ | 0.001  |
| rs10986105 | Diastolic Blood Pressure | t/g | 2145 | 0.003   | 0.007  | 0.659  | -+ | 0.028  |
| rs12468394 | Fasting Glucose          | a/c | 2101 | 0.005   | 0.003  | 0.050  | ++ | 0.345  |
| rs13429458 | Fasting Glucose          | a/c | 1383 | -0.023  | 0.008  | 0.004  | -? | -      |
| rs12478601 | Fasting Glucose          | t/c | 2101 | 0.007   | 0.004  | 0.038  | +- | 0.002  |
| rs13405728 | Fasting Glucose          | a/g | 2113 | 0.003   | 0.005  | 0.559  | -+ | 0.627  |
| rs10818854 | Fasting Glucose          | a/g | 2111 | 0.000   | 0.003  | 0.903  | +- | 0.246  |
| rs2479106  | Fasting Glucose          | a/g | 2111 | 0.002   | 0.003  | 0.458  | ++ | 0.816  |
| rs10986105 | Fasting Glucose          | t/g | 2109 | -0.003  | 0.005  | 0.579  | -+ | 0.252  |
| rs12468394 | Fasting Insulin          | a/c | 2094 | -0.010  | 0.014  | 0.477  | -+ | 0.368  |
| rs13429458 | Fasting Insulin          | a/c | 1385 | -0.001  | 0.020  | 0.960  | -? | -      |
| rs12478601 | Fasting Insulin          | t/c | 2094 | -0.009  | 0.031  | 0.776  | +- | 0.425  |
| rs13405728 | Fasting Insulin          | a/g | 2106 | -0.004  | 0.024  | 0.876  | -- | 0.955  |
| rs10818854 | Fasting Insulin          | a/g | 2104 | -0.007  | 0.020  | 0.736  | +- | 0.446  |
| rs2479106  | Fasting Insulin          | a/g | 2104 | 0.020   | 0.016  | 0.230  | ++ | 0.797  |
| rs10986105 | Fasting Insulin          | t/g | 2102 | 0.048   | 0.045  | 0.290  | ?+ | -      |
| rs12468394 | HbA1C                    | a/c | 1287 | -0.001  | 0.002  | 0.786  | -+ | 0.329  |
| rs13429458 | HbA1C                    | a/c | 635  | 0.001   | 0.004  | 0.803  | +? | -      |
| rs12478601 | HbA1C                    | t/c | 1287 | 0.000   | 0.003  | 0.929  | -+ | 0.618  |
| rs13405728 | HbA1C                    | a/g | 1296 | -0.005  | 0.003  | 0.103  | -- | 0.962  |
| rs10818854 | HbA1C                    | a/g | 1294 | 0.001   | 0.003  | 0.710  | +- | 0.351  |
| rs2479106  | HbA1C                    | a/g | 1294 | 0.001   | 0.002  | 0.735  | ++ | 0.949  |
| rs10986105 | HbA1C                    | t/g | 1293 | -0.003  | 0.004  | 0.474  | -- | 0.301  |
| rs12468394 | Total Cholesterol        | a/c | 2035 | -0.0056 | 0.005  | 0.2696 | -- | 0.8198 |
| rs13429458 | Total Cholesterol        | a/c | 1384 | -0.004  | 0.0212 | 0.85   | -? | 1      |



|            |                       |     |      |         |        |         |    |        |
|------------|-----------------------|-----|------|---------|--------|---------|----|--------|
| rs12478601 | Total Cholesterol     | t/c | 2035 | 0.0014  | 0.0147 | 0.9258  | +  | 0.9877 |
| rs13405728 | Total Cholesterol     | a/g | 2044 | 0.0007  | 0.0085 | 0.9311  | +  | 0.1759 |
| rs10818854 | Total Cholesterol     | a/g | 2042 | 0.0221  | 0.0104 | 0.03405 | +  | 0.8396 |
| rs2479106  | Total Cholesterol     | a/g | 2042 | -0.0002 | 0.0039 | 0.9541  | +  | 0.308  |
| rs10986105 | Total Cholesterol     | t/g | 2040 | -0.0088 | 0.0126 | 0.4863  | +  | 0.762  |
| rs12468394 | LDL cholesterol       | a/c | 2035 | -0.006  | 0.008  | 0.441   | -- | 0.856  |
| rs13429458 | LDL cholesterol       | a/c | 1384 | -0.022  | 0.019  | 0.247   | -? | -      |
| rs12478601 | LDL cholesterol       | t/c | 2028 | 0.013   | 0.023  | 0.584   | +  | 0.799  |
| rs13405728 | LDL cholesterol       | a/g | 2037 | -0.011  | 0.013  | 0.401   | -- | 0.547  |
| rs10818854 | LDL cholesterol       | a/g | 2035 | 0.017   | 0.016  | 0.281   | +  | 0.504  |
| rs2479106  | LDL cholesterol       | a/g | 2035 | 0.000   | 0.006  | 0.969   | +  | 0.240  |
| rs10986105 | LDL cholesterol       | t/g | 2033 | 0.007   | 0.019  | 0.699   | ++ | 0.623  |
| rs12468394 | HDL cholesterol       | a/c | 2035 | -0.001  | 0.007  | 0.863   | +- | 0.420  |
| rs13429458 | HDL cholesterol       | a/c | 1384 | 0.010   | 0.014  | 0.475   | +? | -      |
| rs12478601 | HDL cholesterol       | t/c | 2035 | -0.016  | 0.011  | 0.138   | -- | 0.369  |
| rs13405728 | HDL cholesterol       | a/g | 2044 | 0.006   | 0.012  | 0.611   | +- | 0.389  |
| rs10818854 | HDL cholesterol       | a/g | 2042 | 0.015   | 0.011  | 0.181   | ++ | 0.870  |
| rs2479106  | HDL cholesterol       | a/g | 2042 | -0.006  | 0.006  | 0.321   | -- | 0.795  |
| rs10986105 | HDL cholesterol       | t/g | 2040 | -0.014  | 0.014  | 0.314   | -- | 0.484  |
| rs12468394 | Triglycerides         | a/c | 2034 | -0.011  | 0.011  | 0.342   | +  | 0.193  |
| rs13429458 | Triglycerides         | a/c | 1384 | 0.047   | 0.027  | 0.082   | +? | -      |
| rs12478601 | Triglycerides         | t/c | 2034 | 0.000   | 0.008  | 1.000   | +- | 0.223  |
| rs13405728 | Triglycerides         | a/g | 2043 | -0.036  | 0.021  | 0.082   | -- | 0.159  |
| rs10818854 | Triglycerides         | a/g | 2041 | 0.029   | 0.026  | 0.275   | +  | 0.932  |
| rs2479106  | Triglycerides         | a/g | 2041 | 0.006   | 0.008  | 0.424   | +  | 0.187  |
| rs10986105 | Triglycerides         | t/g | 2039 | -0.012  | 0.029  | 0.672   | +- | 0.449  |
| rs12468394 | Total Cholesterol/HDL | a/c | 2035 | -0.0029 | 0.0079 | 0.7085  | +  | 0.4492 |
| rs13429458 | Total Cholesterol/HDL | a/c | 1384 | -0.014  | 0.0194 | 0.47    | -? | 1      |
| rs12478601 | Total Cholesterol/HDL | t/c | 2035 | 0.0069  | 0.0061 | 0.2611  | ++ | 0.2327 |
| rs13405728 | Total Cholesterol/HDL | a/g | 2044 | -0.0115 | 0.0137 | 0.4037  | -- | 0.187  |
| rs10818854 | Total Cholesterol/HDL | a/g | 2042 | -0.0007 | 0.016  | 0.9667  | +  | 0.4558 |
| rs2479106  | Total Cholesterol/HDL | a/g | 2042 | 0.0087  | 0.0067 | 0.1941  | +  | 0.2938 |

---

|            |                       |     |      |        |        |        |    |       |
|------------|-----------------------|-----|------|--------|--------|--------|----|-------|
| rs10986105 | Total Cholesterol/HDL | t/g | 2040 | 0.0083 | 0.0185 | 0.6536 | +- | 0.287 |
|------------|-----------------------|-----|------|--------|--------|--------|----|-------|

**Supplementary Table 5.** Power estimates for detecting association between seven PCOS risk variants, previously identified in Han Chinese women (5), in women of European ancestry in the combined sample sets from Iceland, Boston and Chicago. The power is calculated for the combined effective sample size of 1,349 cases and 1,349 controls, estimated as the sum of the geometric mean of the number of cases and controls for each sample set. The Icelandic effective sample size is further reduced by dividing it by a genomic control factor of 1.16 to adjust for the relatedness of cases and controls. Two sets of power estimates are presented, both assuming seven markers tested and a significance threshold of  $\alpha = 0.05/7 \approx 0.007$  and the minor allele frequency observed in European populations. One set estimates the power assuming the effect estimates observed in the Chinese population (5); the other estimates the effect (OR) detectable with 90% power.

| SNP        | Locus | OR in Chinese population | Minor allele frequency in Europeans | Power ( $\alpha = 0.007$ ) | OR detectable with 90% power |
|------------|-------|--------------------------|-------------------------------------|----------------------------|------------------------------|
| rs13405728 | 2p16  | 1.41                     | 0.051                               | 61%                        | 1.57                         |
| rs12478601 | 2p21  | 1.39                     | 0.389                               | > 99%                      | 1.25                         |
| rs13429458 | 2p21  | 1.49                     | 0.117                               | > 99%                      | 1.37                         |
| rs12468394 | 2p21  | 1.39                     | 0.475                               | > 99%                      | 1.24                         |
| rs10986105 | 9q33  | 1.47                     | 0.037                               | 63%                        | 1.64                         |
| rs10818854 | 9q33  | 1.51                     | 0.046                               | 82%                        | 1.57                         |
| rs2479106  | 9q33  | 1.34                     | 0.256                               | > 99%                      | 1.29                         |

**Supplementary Table 6.** Association with PCOS in the Icelandic samples at the three loci, **a) 2p16, b) 2p21 and c) 9q33**, for all markers identified in the October 2010 release of the 1000 Genome Project dataset (1GP)(4) and that have correlation  $r^2 > 0.5$  in the 197 Han Chinese samples with any one of the seven reported PCOS risk variants (5). The association is tested using the SNPTTEST program (6) and genotypes imputed into the Icelandic samples based on phased haplotypes for the 1094 individuals in the 1GP. Each table includes for each SNP its identifier and NCBI Build 37 position, the effect and non-effect allele, the frequency in the Han Chinese (CHB and CHS) and European (CEU, GBR and TSI) samples from 1GP and in the Icelandic samples, and the estimated OR and *P* value. The tables also included, for each loci, the *P* value when the association is tested conditional on each of the reported risk variants, and the correlation ( $r^2$ ) between the SNP and corresponding reported risk variant, estimated both for the Han Chinese and European 1GP samples, respectively. All reported *P* values have been adjusted using the genomic control factor of 1.16. In each table results for the previously reported risk variants are highlighted in bold.

**a) 2p16**

| SNP        | Position | Allele |       | Frequency |        |         | OR   | <i>P</i> | Info | Conditional on rs13405728 |              |          |
|------------|----------|--------|-------|-----------|--------|---------|------|----------|------|---------------------------|--------------|----------|
|            |          | Effect | Other | China     | Europe | Iceland |      |          |      | China $r^2$               | Europe $r^2$ | <i>P</i> |
| 2-48958626 | 48958626 | A      | G     | 0.815     | 0.925  | 0.952   | 1.05 | 0.81     | 0.91 | 0.61                      | 0.65         | 0.96     |
| 2-48958647 | 48958647 | C      | T     | 0.815     | 0.925  | 0.952   | 1.05 | 0.82     | 0.90 | 0.61                      | 0.65         | 0.95     |
| 2-48958687 | 48958687 | G      | T     | 0.815     | 0.925  | 0.945   | 1.10 | 0.61     | 0.94 | 0.61                      | 0.65         | 0.58     |
| 2-48959537 | 48959537 | T      | C     | 0.815     | 0.925  | 0.945   | 1.10 | 0.6      | 0.94 | 0.61                      | 0.65         | 0.57     |
| 2-48960317 | 48960317 | A      | G     | 0.810     | 0.662  | 0.664   | 1.16 | 0.085    | 0.99 | 0.59                      | 0.10         | 0.11     |
| 2-48961641 | 48961641 | A      | C     | 0.820     | 0.925  | 0.946   | 1.08 | 0.69     | 0.94 | 0.62                      | 0.65         | 0.64     |
| 2-48964184 | 48964184 | G      | A     | 0.787     | 0.962  | 0.964   | 1.20 | 0.42     | 0.92 | 0.77                      | 0.73         | 0.55     |
| 2-48965603 | 48965603 | T      | C     | 0.749     | 0.942  | 0.948   | 1.11 | 0.59     | 0.94 | 0.94                      | 0.86         | 0.87     |
| 2-48965846 | 48965846 | T      | A     | 0.746     | 0.942  | 0.948   | 1.11 | 0.59     | 0.94 | 0.95                      | 0.86         | 0.87     |
| 2-48966039 | 48966039 | A      | C     | 0.744     | 0.942  | 0.947   | 1.12 | 0.53     | 0.94 | 0.96                      | 0.86         | 0.9      |
| 2-48967555 | 48967555 | T      | C     | 0.746     | 0.942  | 0.947   | 1.13 | 0.52     | 0.94 | 0.97                      | 0.86         | 0.8      |
| 2-48967735 | 48967735 | T      | C     | 0.749     | 0.947  | 0.950   | 1.15 | 0.46     | 0.92 | 0.94                      | 0.89         | 0.54     |
| 2-48972552 | 48972552 | A      | G     | 0.741     | 0.671  | 0.659   | 1.18 | 0.051    | 0.99 | 0.98                      | 0.11         | 0.064    |
| 2-48972674 | 48972674 | C      | T     | 0.835     | 0.945  | 0.949   | 1.19 | 0.36     | 0.93 | 0.62                      | 0.78         | 0.32     |
| 2-48973127 | 48973127 | G      | A     | 0.746     | 0.942  | 0.948   | 1.11 | 0.57     | 0.94 | 1.00                      | 0.86         | 1        |
| 2-48975492 | 48975492 | G      | T     | 0.746     | 0.942  | 0.948   | 1.11 | 0.57     | 0.93 | 1.00                      | 0.86         | 0.99     |

| <b>rs13405728</b> | <b>48978159</b> | <b>A</b> | <b>G</b> | <b>0.746</b> | <b>0.949</b> | <b>0.954</b> | <b>1.12</b> | <b>0.55</b> | <b>0.93</b> | <b>-</b> | <b>-</b> | <b>-</b> |
|-------------------|-----------------|----------|----------|--------------|--------------|--------------|-------------|-------------|-------------|----------|----------|----------|
| 2-48982868        | 48982868        | C        | A        | 0.749        | 0.942        | 0.949        | 1.10        | 0.61        | 0.93        | 0.99     | 0.86     | 0.91     |
| 2-48983222        | 48983222        | T        | G        | 0.779        | 0.962        | 0.967        | 1.21        | 0.41        | 0.94        | 0.82     | 0.73     | 0.49     |
| 2-48983395        | 48983395        | G        | A        | 0.746        | 0.905        | 0.900        | 0.98        | 0.88        | 0.95        | 0.98     | 0.53     | 0.49     |
| 2-48983633        | 48983633        | G        | A        | 0.749        | 0.942        | 0.949        | 1.10        | 0.61        | 0.93        | 0.99     | 0.86     | 0.91     |
| 2-48986474        | 48986474        | A        | G        | 0.741        | 0.940        | 0.947        | 1.12        | 0.54        | 0.92        | 0.95     | 0.83     | 0.27     |
| 2-48988149        | 48988149        | G        | A        | 0.741        | 0.942        | 0.947        | 1.12        | 0.53        | 0.92        | 0.95     | 0.86     | 0.27     |
| 2-48991542        | 48991542        | T        | G        | 0.766        | 0.962        | 0.963        | 1.22        | 0.37        | 0.89        | 0.77     | 0.73     | 0.15     |
| 2-48993470        | 48993470        | T        | G        | 0.678        | 0.759        | 0.783        | 1.01        | 0.95        | 0.96        | 0.76     | 0.16     | 0.96     |
| 2-48994107        | 48994107        | T        | C        | 0.678        | 0.759        | 0.784        | 1.00        | 0.99        | 0.96        | 0.76     | 0.16     | 0.9      |
| 2-48995339        | 48995339        | T        | A        | 0.678        | 0.754        | 0.779        | 1.01        | 0.94        | 0.96        | 0.76     | 0.16     | 0.97     |
| 2-48995644        | 48995644        | T        | C        | 0.678        | 0.752        | 0.778        | 1.01        | 0.94        | 0.96        | 0.76     | 0.15     | 0.97     |
| 2-48996686        | 48996686        | C        | A        | 0.761        | 0.942        | 0.949        | 1.10        | 0.63        | 0.92        | 0.83     | 0.86     | 0.54     |
| 2-48997123        | 48997123        | A        | G        | 0.703        | 0.752        | 0.778        | 1.01        | 0.93        | 0.95        | 0.66     | 0.15     | 0.98     |
| 2-48999442        | 48999442        | C        | T        | 0.764        | 0.909        | 0.929        | 0.83        | 0.22        | 0.97        | 0.60     | 0.12     | 0.17     |
| 2-48999658        | 48999658        | G        | A        | 0.764        | 0.881        | 0.895        | 0.92        | 0.53        | 0.98        | 0.60     | 0.08     | 0.48     |
| 2-48999834        | 48999834        | C        | T        | 0.764        | 0.881        | 0.895        | 0.92        | 0.53        | 0.99        | 0.60     | 0.08     | 0.48     |
| 2-49001640        | 49001640        | G        | A        | 0.759        | 0.914        | 0.932        | 1.00        | 0.98        | 0.98        | 0.58     | 0.09     | 0.94     |
| rs10194838        | 49003566        | C        | T        | 0.751        | 0.881        | 0.889        | 0.84        | 0.23        | 0.78        | 0.60     | 0.08     | 0.21     |
| 2-49004199        | 49004199        | G        | A        | 0.751        | 0.881        | 0.895        | 0.92        | 0.54        | 0.99        | 0.60     | 0.08     | 0.43     |
| 2-49004459        | 49004459        | T        | C        | 0.754        | 0.883        | 0.895        | 0.92        | 0.54        | 0.99        | 0.59     | 0.07     | 0.43     |
| 2-49004757        | 49004757        | T        | C        | 0.759        | 0.883        | 0.896        | 0.91        | 0.49        | 0.99        | 0.57     | 0.07     | 0.39     |
| 2-49005866        | 49005866        | G        | T        | 0.744        | 0.920        | 0.939        | 0.97        | 0.85        | 0.91        | 0.59     | 0.09     | 0.72     |

b) 2p21

| SNP        | Position | Allele |       | Frequency |        |         | OR   | P    | Info | Conditional on rs12468394 |              |      | Conditional on rs12478601 |              |      | Conditional on rs13429458 |              |      |
|------------|----------|--------|-------|-----------|--------|---------|------|------|------|---------------------------|--------------|------|---------------------------|--------------|------|---------------------------|--------------|------|
|            |          | Effect | Other | China     | Europe | Iceland |      |      |      | China $r^2$               | Europe $r^2$ | P    | China $r^2$               | Europe $r^2$ | P    | China $r^2$               | Europe $r^2$ | P    |
| 2-43452183 | 43452183 | A      | G     | 0.754     | 0.631  | 0.614   | 0.98 | 0.82 | 0.94 | 0.57                      | 0.05         | 0.59 | 0.49                      | 0.12         | 0.44 | 0.55                      | 0.20         | 0.48 |
| 2-43455654 | 43455654 | T      | C     | 0.744     | 0.818  | 0.831   | 1.11 | 0.35 | 0.94 | 0.58                      | 0.18         | 0.56 | 0.50                      | 0.18         | 0.97 | 0.59                      | 0.38         | 0.87 |
| 2-43467835 | 43467835 | G      | A     | 0.736     | 0.812  | 0.832   | 1.08 | 0.49 | 0.99 | 0.65                      | 0.20         | 0.76 | 0.56                      | 0.19         | 0.82 | 0.62                      | 0.41         | 0.84 |
| rs7595299  | 43480317 | G      | A     | 0.746     | 0.821  | 0.837   | 1.08 | 0.50 | 0.99 | 0.69                      | 0.19         | 0.75 | 0.64                      | 0.19         | 0.84 | 0.72                      | 0.33         | 0.89 |
| rs6749927  | 43484556 | A      | G     | 0.728     | 0.622  | 0.598   | 0.98 | 0.85 | 0.98 | 0.74                      | 0.05         | 0.61 | 0.67                      | 0.12         | 0.48 | 0.69                      | 0.21         | 0.49 |
| 2-43490619 | 43490619 | A      | T     | 0.723     | 0.808  | 0.826   | 1.08 | 0.48 | 0.99 | 0.63                      | 0.20         | 0.75 | 0.55                      | 0.18         | 0.82 | 0.64                      | 0.41         | 0.81 |
| rs6749108  | 43496986 | C      | T     | 0.741     | 0.655  | 0.617   | 0.95 | 0.57 | 0.94 | 0.74                      | 0.11         | 0.33 | 0.69                      | 0.02         | 0.62 | 0.68                      | 0.25         | 0.26 |
| 2-43500976 | 43500976 | G      | C     | 0.751     | 0.777  | 0.807   | 1.13 | 0.24 | 1.00 | 0.69                      | 0.26         | 0.40 | 0.64                      | 0.22         | 0.79 | 0.69                      | 0.39         | 0.61 |
| 2-43501802 | 43501802 | G      | A     | 0.741     | 0.259  | 0.287   | 1.08 | 0.37 | 0.99 | 0.73                      | 0.23         | 0.52 | 0.69                      | 0.35         | 0.67 | 0.65                      | 0.08         | 0.51 |
| 2-43501970 | 43501970 | C      | T     | 0.741     | 0.412  | 0.427   | 1.06 | 0.51 | 0.97 | 0.73                      | 0.43         | 0.80 | 0.69                      | 0.20         | 0.87 | 0.65                      | 0.13         | 0.75 |
| 2-43502477 | 43502477 | G      | A     | 0.749     | 0.440  | 0.471   | 1.10 | 0.24 | 0.97 | 0.70                      | 0.35         | 0.37 | 0.67                      | 0.25         | 0.81 | 0.68                      | 0.14         | 0.41 |
| rs7561670  | 43506259 | G      | A     | 0.749     | 0.779  | 0.809   | 1.13 | 0.24 | 1.00 | 0.69                      | 0.26         | 0.40 | 0.65                      | 0.23         | 0.80 | 0.71                      | 0.40         | 0.61 |
| 2-43508205 | 43508205 | G      | A     | 0.711     | 0.418  | 0.449   | 1.09 | 0.28 | 1.00 | 0.84                      | 0.41         | 0.44 | 0.77                      | 0.27         | 0.95 | 0.57                      | 0.14         | 0.45 |
| 2-43509140 | 43509140 | G      | C     | 0.701     | 0.232  | 0.267   | 1.06 | 0.52 | 0.99 | 0.88                      | 0.28         | 0.74 | 0.81                      | 0.42         | 0.36 | 0.56                      | 0.06         | 0.69 |
| rs7599564  | 43509617 | A      | G     | 0.695     | 0.360  | 0.387   | 1.03 | 0.69 | 0.98 | 0.91                      | 0.53         | 0.91 | 0.83                      | 0.24         | 0.54 | 0.60                      | 0.10         | 0.93 |
| rs11900952 | 43514036 | G      | A     | 0.739     | 0.619  | 0.638   | 1.05 | 0.54 | 0.99 | 0.72                      | 0.07         | 0.71 | 0.68                      | 0.22         | 0.73 | 0.70                      | 0.21         | 0.93 |
| 2-43515427 | 43515427 | C      | T     | 0.746     | 0.779  | 0.806   | 1.12 | 0.28 | 1.00 | 0.70                      | 0.26         | 0.47 | 0.66                      | 0.23         | 0.90 | 0.72                      | 0.40         | 0.71 |
| 2-43516146 | 43516146 | G      | A     | 0.739     | 0.744  | 0.760   | 1.05 | 0.64 | 0.99 | 0.72                      | 0.31         | 0.95 | 0.68                      | 0.15         | 0.79 | 0.70                      | 0.35         | 0.75 |
| 2-43516330 | 43516330 | T      | C     | 0.739     | 0.744  | 0.758   | 1.05 | 0.61 | 0.99 | 0.72                      | 0.31         | 0.99 | 0.68                      | 0.15         | 0.82 | 0.70                      | 0.35         | 0.79 |
| 2-43516776 | 43516776 | G      | A     | 0.749     | 0.779  | 0.806   | 1.12 | 0.28 | 1.00 | 0.71                      | 0.26         | 0.47 | 0.67                      | 0.23         | 0.89 | 0.73                      | 0.40         | 0.71 |
| 2-43532302 | 43532302 | C      | T     | 0.751     | 0.786  | 0.814   | 1.13 | 0.25 | 0.98 | 0.72                      | 0.27         | 0.41 | 0.70                      | 0.23         | 0.81 | 0.74                      | 0.43         | 0.62 |
| 2-43533214 | 43533214 | G      | A     | 0.741     | 0.401  | 0.447   | 1.10 | 0.27 | 0.98 | 0.78                      | 0.45         | 0.44 | 0.73                      | 0.34         | 0.94 | 0.69                      | 0.12         | 0.44 |
| 2-43537711 | 43537711 | C      | A     | 0.698     | 0.237  | 0.237   | 1.08 | 0.43 | 0.98 | 0.88                      | 0.30         | 0.71 | 0.82                      | 0.31         | 0.72 | 0.55                      | 0.08         | 0.57 |
| 2-43541386 | 43541386 | G      | A     | 0.716     | 0.425  | 0.442   | 1.05 | 0.55 | 0.99 | 0.89                      | 0.42         | 0.83 | 0.84                      | 0.29         | 0.58 | 0.62                      | 0.15         | 0.80 |
| 2-43541598 | 43541598 | C      | T     | 0.706     | 0.350  | 0.315   | 1.03 | 0.76 | 0.99 | 0.91                      | 0.51         | 0.72 | 0.86                      | 0.14         | 0.79 | 0.59                      | 0.13         | 0.96 |
| 2-43542507 | 43542507 | C      | T     | 0.749     | 0.792  | 0.814   | 1.14 | 0.21 | 0.98 | 0.71                      | 0.27         | 0.37 | 0.68                      | 0.23         | 0.73 | 0.72                      | 0.48         | 0.52 |
| 2-43543555 | 43543555 | C      | A     | 0.749     | 0.675  | 0.663   | 1.00 | 0.98 | 0.99 | 0.71                      | 0.07         | 0.96 | 0.68                      | 0.05         | 0.88 | 0.72                      | 0.30         | 0.53 |
| 2-43544014 | 43544014 | C      | T     | 0.751     | 0.673  | 0.663   | 1.00 | 0.99 | 0.99 | 0.73                      | 0.07         | 0.95 | 0.69                      | 0.05         | 0.87 | 0.73                      | 0.29         | 0.53 |
| 2-43548128 | 43548128 | G      | A     | 0.751     | 0.783  | 0.802   | 1.14 | 0.19 | 0.98 | 0.73                      | 0.26         | 0.32 | 0.69                      | 0.25         | 0.70 | 0.73                      | 0.45         | 0.46 |

|                   |                 |          |          |              |              |              |             |             |             |             |             |             |             |             |             |             |             |             |
|-------------------|-----------------|----------|----------|--------------|--------------|--------------|-------------|-------------|-------------|-------------|-------------|-------------|-------------|-------------|-------------|-------------|-------------|-------------|
| 2-43553949        | 43553949        | T        | C        | 0.683        | 0.195        | 0.180        | 1.13        | 0.27        | 0.96        | 0.86        | 0.24        | 0.44        | 0.82        | 0.26        | 0.83        | 0.59        | 0.07        | 0.35        |
| 2-43555506        | 43555506        | T        | C        | 0.688        | 0.195        | 0.180        | 1.13        | 0.27        | 0.96        | 0.86        | 0.24        | 0.45        | 0.82        | 0.26        | 0.84        | 0.59        | 0.07        | 0.35        |
| <b>rs12468394</b> | <b>43561161</b> | <b>C</b> | <b>A</b> | <b>0.711</b> | <b>0.475</b> | <b>0.497</b> | <b>1.08</b> | <b>0.32</b> | <b>0.98</b> | -           | -           | -           | <b>0.86</b> | <b>0.37</b> | <b>0.83</b> | <b>0.60</b> | <b>0.14</b> | <b>0.52</b> |
| 2-43561771        | 43561771        | A        | G        | 0.713        | 0.462        | 0.532        | 1.12        | 0.17        | 0.91        | 0.90        | 0.48        | 0.33        | 0.83        | 0.39        | 0.77        | 0.61        | 0.07        | 0.27        |
| 2-43561780        | 43561780        | G        | A        | 0.721        | 0.464        | 0.534        | 1.12        | 0.19        | 0.92        | 0.86        | 0.48        | 0.38        | 0.80        | 0.38        | 0.69        | 0.61        | 0.07        | 0.30        |
| 2-43561815        | 43561815        | C        | G        | 0.756        | 0.398        | 0.465        | 1.15        | 0.11        | 0.87        | 0.72        | 0.33        | 0.21        | 0.67        | 0.39        | 0.63        | 0.48        | 0.00        | 0.11        |
| 2-43563114        | 43563114        | C        | T        | 0.690        | 0.179        | 0.174        | 1.13        | 0.25        | 0.95        | 0.92        | 0.22        | 0.41        | 0.85        | 0.21        | 0.75        | 0.60        | 0.07        | 0.32        |
| 2-43590329        | 43590329        | C        | T        | 0.695        | 0.245        | 0.235        | 1.11        | 0.29        | 0.99        | 0.86        | 0.31        | 0.48        | 0.94        | 0.34        | 0.96        | 0.58        | 0.09        | 0.39        |
| 2-43594489        | 43594489        | A        | T        | 0.680        | 0.332        | 0.354        | 1.16        | 0.08        | 0.99        | 0.85        | 0.55        | 0.15        | 0.93        | 0.67        | 0.88        | 0.59        | 0.11        | 0.14        |
| 2-43633568        | 43633568        | T        | C        | 0.723        | 0.487        | 0.534        | 1.21        | 0.02        | 0.96        | 0.75        | 0.15        | 0.038       | 0.75        | 0.50        | 0.39        | 0.76        | 0.16        | 0.046       |
| 2-43634468        | 43634468        | T        | C        | 0.779        | 0.883        | 0.877        | 1.16        | 0.26        | 0.92        | 0.61        | 0.14        | 0.39        | 0.63        | 0.11        | 0.66        | 0.99        | 1.00        | 0.75        |
| 2-43634922        | 43634922        | T        | C        | 0.734        | 0.485        | 0.535        | 1.20        | 0.02        | 0.97        | 0.77        | 0.14        | 0.038       | 0.78        | 0.50        | 0.40        | 0.79        | 0.16        | 0.046       |
| 2-43637998        | 43637998        | A        | G        | 0.678        | 0.274        | 0.316        | 1.15        | 0.11        | 1.00        | 0.83        | 0.19        | 0.16        | 0.95        | 0.55        | 0.97        | 0.63        | 0.09        | 0.18        |
| 2-43638185        | 43638185        | C        | T        | 0.680        | 0.292        | 0.339        | 1.11        | 0.24        | 0.99        | 0.83        | 0.23        | 0.35        | 0.96        | 0.57        | 0.61        | 0.62        | 0.10        | 0.37        |
| <b>rs13429458</b> | <b>43638838</b> | <b>A</b> | <b>C</b> | <b>0.777</b> | <b>0.883</b> | <b>0.879</b> | <b>1.15</b> | <b>0.27</b> | <b>0.92</b> | <b>0.60</b> | <b>0.14</b> | <b>0.40</b> | <b>0.62</b> | <b>0.11</b> | <b>0.69</b> | -           | -           | -           |
| 2-43638855        | 43638855        | C        | T        | 0.680        | 0.294        | 0.339        | 1.11        | 0.24        | 0.99        | 0.83        | 0.24        | 0.35        | 0.96        | 0.57        | 0.61        | 0.62        | 0.10        | 0.37        |
| 2-43638888        | 43638888        | T        | C        | 0.779        | 0.883        | 0.879        | 1.15        | 0.27        | 0.92        | 0.61        | 0.14        | 0.40        | 0.63        | 0.11        | 0.69        | 0.99        | 1.00        | 1.00        |
| 2-43638947        | 43638947        | T        | C        | 0.680        | 0.290        | 0.339        | 1.10        | 0.24        | 0.99        | 0.83        | 0.23        | 0.36        | 0.96        | 0.57        | 0.60        | 0.62        | 0.10        | 0.38        |
| rs7605725         | 43641627        | A        | G        | 0.731        | 0.651        | 0.641        | 0.99        | 0.88        | 0.99        | 0.66        | 0.06        | 0.85        | 0.77        | 0.05        | 0.70        | 0.77        | 0.25        | 0.41        |
| 2-43644556        | 43644556        | C        | T        | 0.688        | 0.400        | 0.477        | 1.19        | 0.04        | 0.99        | 0.86        | 0.42        | 0.062       | 0.97        | 0.92        | 1.00        | 0.63        | 0.13        | 0.067       |
| 2-43647464        | 43647464        | G        | A        | 0.784        | 0.885        | 0.881        | 1.15        | 0.30        | 0.91        | 0.63        | 0.14        | 0.45        | 0.62        | 0.11        | 0.72        | 0.96        | 0.98        | 0.91        |
| rs10176241        | 43648176        | A        | G        | 0.670        | 0.367        | 0.394        | 1.10        | 0.24        | 0.99        | 0.82        | 0.38        | 0.40        | 0.89        | 0.30        | 0.97        | 0.57        | 0.12        | 0.38        |
| 2-43649780        | 43649780        | A        | C        | 0.678        | 0.396        | 0.475        | 1.17        | 0.050       | 0.98        | 0.85        | 0.39        | 0.092       | 0.95        | 0.92        | 0.60        | 0.59        | 0.12        | 0.094       |
| 2-43658423        | 43658423        | C        | A        | 0.673        | 0.405        | 0.475        | 1.20        | 0.029       | 0.97        | 0.83        | 0.38        | 0.052       | 0.93        | 0.86        | 0.71        | 0.58        | 0.12        | 0.056       |
| 2-43665245        | 43665245        | G        | C        | 0.685        | 0.416        | 0.506        | 1.14        | 0.10        | 0.98        | 0.87        | 0.40        | 0.19        | 0.98        | 0.87        | 0.30        | 0.62        | 0.12        | 0.18        |
| 2-43667335        | 43667335        | T        | C        | 0.721        | 0.690        | 0.700        | 1.03        | 0.78        | 0.99        | 0.66        | 0.03        | 0.89        | 0.78        | 0.03        | 0.97        | 0.69        | 0.20        | 0.75        |
| 2-43670449        | 43670449        | T        | A        | 0.721        | 0.697        | 0.710        | 1.00        | 0.96        | 0.98        | 0.66        | 0.04        | 0.82        | 0.76        | 0.04        | 0.73        | 0.67        | 0.21        | 0.47        |
| rs6744642         | 43671904        | C        | T        | 0.731        | 0.701        | 0.729        | 1.10        | 0.34        | 0.90        | 0.70        | 0.04        | 0.45        | 0.79        | 0.04        | 0.60        | 0.70        | 0.21        | 0.71        |
| 2-43673316        | 43673316        | G        | C        | 0.718        | 0.701        | 0.715        | 0.99        | 0.93        | 0.98        | 0.65        | 0.04        | 0.81        | 0.77        | 0.04        | 0.72        | 0.69        | 0.22        | 0.42        |
| 2-43674242        | 43674242        | T        | G        | 0.665        | 0.380        | 0.409        | 1.10        | 0.28        | 0.95        | 0.80        | 0.08        | 0.38        | 0.92        | 0.35        | 0.68        | 0.55        | 0.08        | 0.42        |
| 2-43674354        | 43674354        | C        | G        | 0.683        | 0.480        | 0.504        | 1.07        | 0.43        | 0.97        | 0.81        | 0.23        | 0.64        | 0.93        | 0.19        | 0.78        | 0.59        | 0.13        | 0.66        |
| 2-43676747        | 43676747        | A        | G        | 0.718        | 0.688        | 0.693        | 0.98        | 0.78        | 0.98        | 0.65        | 0.03        | 0.69        | 0.77        | 0.04        | 0.51        | 0.69        | 0.19        | 0.33        |
| 2-43677509        | 43677509        | G        | A        | 0.782        | 0.892        | 0.891        | 1.20        | 0.18        | 0.92        | 0.64        | 0.12        | 0.27        | 0.62        | 0.11        | 0.50        | 0.95        | 0.88        | 0.31        |
| 2-43679175        | 43679175        | A        | G        | 0.660        | 0.301        | 0.356        | 1.11        | 0.21        | 0.96        | 0.79        | 0.15        | 0.33        | 0.92        | 0.55        | 0.55        | 0.55        | 0.06        | 0.33        |
| 2-43688496        | 43688496        | C        | T        | 0.678        | 0.429        | 0.500        | 1.20        | 0.022       | 0.98        | 0.82        | 0.36        | 0.035       | 0.95        | 0.84        | 0.49        | 0.57        | 0.14        | 0.045       |
| 2-43709366        | 43709366        | C        | G        | 0.678        | 0.387        | 0.460        | 1.22        | 0.016       | 0.99        | 0.85        | 0.36        | 0.024       | 0.99        | 0.96        | 0.18        | 0.61        | 0.11        | 0.031       |

|                   |                 |          |          |              |              |              |             |              |             |             |             |              |      |      |      |             |             |             |
|-------------------|-----------------|----------|----------|--------------|--------------|--------------|-------------|--------------|-------------|-------------|-------------|--------------|------|------|------|-------------|-------------|-------------|
| 2-43711066        | 43711066        | T        | C        | 0.721        | 0.785        | 0.811        | 1.19        | 0.092        | 0.98        | 0.66        | 0.25        | 0.15         | 0.78 | 0.24 | 0.42 | 0.71        | 0.37        | 0.20        |
| 2-43711925        | 43711925        | A        | G        | 0.673        | 0.387        | 0.459        | 1.22        | 0.016        | 0.99        | 0.83        | 0.36        | 0.025        | 0.97 | 0.96 | 0.21 | 0.62        | 0.11        | 0.033       |
| 2-43714728        | 43714728        | C        | T        | 0.728        | 0.785        | 0.812        | 1.19        | 0.094        | 0.98        | 0.69        | 0.25        | 0.15         | 0.82 | 0.24 | 0.42 | 0.74        | 0.37        | 0.21        |
| 2-43715824        | 43715824        | A        | G        | 0.678        | 0.387        | 0.460        | 1.22        | 0.016        | 0.98        | 0.85        | 0.36        | 0.025        | 0.97 | 0.96 | 0.21 | 0.61        | 0.11        | 0.033       |
| 2-43717650        | 43717650        | T        | C        | 0.675        | 0.381        | 0.446        | 1.18        | 0.044        | 0.99        | 0.84        | 0.36        | 0.075        | 0.98 | 0.94 | 0.81 | 0.62        | 0.11        | 0.083       |
| <b>rs12478601</b> | <b>43721508</b> | <b>C</b> | <b>T</b> | <b>0.680</b> | <b>0.389</b> | <b>0.470</b> | <b>1.19</b> | <b>0.028</b> | <b>0.99</b> | <b>0.86</b> | <b>0.37</b> | <b>0.046</b> | -    | -    | -    | <b>0.62</b> | <b>0.11</b> | <b>0.06</b> |
| 2-43723977        | 43723977        | T        | C        | 0.726        | 0.783        | 0.811        | 1.19        | 0.10         | 0.97        | 0.68        | 0.26        | 0.17         | 0.80 | 0.24 | 0.44 | 0.73        | 0.36        | 0.23        |
| 2-43724910        | 43724910        | G        | C        | 0.726        | 0.790        | 0.813        | 1.19        | 0.09         | 0.98        | 0.68        | 0.25        | 0.15         | 0.80 | 0.22 | 0.41 | 0.73        | 0.37        | 0.20        |
| 2-43733697        | 43733697        | G        | C        | 0.728        | 0.774        | 0.807        | 1.16        | 0.15         | 0.98        | 0.69        | 0.29        | 0.26         | 0.82 | 0.26 | 0.62 | 0.74        | 0.40        | 0.38        |
| 2-43737063        | 43737063        | C        | T        | 0.728        | 0.779        | 0.808        | 1.17        | 0.13         | 0.98        | 0.69        | 0.28        | 0.22         | 0.82 | 0.25 | 0.56 | 0.74        | 0.42        | 0.32        |
| 2-43738173        | 43738173        | T        | C        | 0.678        | 0.277        | 0.337        | 1.13        | 0.15         | 0.97        | 0.85        | 0.21        | 0.22         | 0.99 | 0.61 | 0.74 | 0.61        | 0.08        | 0.23        |
| 2-43743012        | 43743012        | T        | C        | 0.782        | 0.816        | 0.830        | 1.12        | 0.30         | 0.95        | 0.58        | 0.23        | 0.48         | 0.58 | 0.21 | 0.91 | 0.90        | 0.50        | 0.80        |
| 2-43744461        | 43744461        | T        | C        | 0.779        | 0.883        | 0.878        | 1.21        | 0.14         | 0.91        | 0.59        | 0.14        | 0.22         | 0.55 | 0.09 | 0.44 | 0.84        | 0.86        | 0.17        |
| 2-43754992        | 43754992        | C        | T        | 0.728        | 0.785        | 0.809        | 1.18        | 0.11         | 0.97        | 0.69        | 0.27        | 0.19         | 0.80 | 0.24 | 0.49 | 0.71        | 0.37        | 0.26        |
| 2-43764398        | 43764398        | A        | G        | 0.680        | 0.387        | 0.449        | 1.18        | 0.040        | 0.99        | 0.84        | 0.34        | 0.067        | 0.96 | 0.87 | 0.98 | 0.62        | 0.10        | 0.073       |
| 2-43767039        | 43767039        | G        | A        | 0.678        | 0.400        | 0.456        | 1.17        | 0.051        | 0.99        | 0.85        | 0.33        | 0.087        | 0.97 | 0.85 | 0.90 | 0.61        | 0.09        | 0.093       |
| 2-43769396        | 43769396        | C        | T        | 0.680        | 0.412        | 0.468        | 1.16        | 0.068        | 0.99        | 0.80        | 0.36        | 0.12         | 0.94 | 0.88 | 0.57 | 0.58        | 0.09        | 0.12        |
| 2-43770877        | 43770877        | T        | G        | 0.728        | 0.786        | 0.809        | 1.19        | 0.10         | 0.98        | 0.63        | 0.23        | 0.16         | 0.76 | 0.21 | 0.44 | 0.67        | 0.36        | 0.22        |
| 2-43771573        | 43771573        | G        | C        | 0.723        | 0.690        | 0.705        | 1.14        | 0.14         | 0.97        | 0.65        | 0.06        | 0.19         | 0.77 | 0.33 | 0.71 | 0.64        | 0.22        | 0.30        |
| 2-43772135        | 43772135        | G        | A        | 0.728        | 0.785        | 0.809        | 1.18        | 0.11         | 0.99        | 0.63        | 0.23        | 0.18         | 0.76 | 0.21 | 0.46 | 0.67        | 0.36        | 0.24        |
| 2-43772224        | 43772224        | C        | G        | 0.769        | 0.673        | 0.694        | 1.14        | 0.14         | 0.98        | 0.52        | 0.07        | 0.20         | 0.62 | 0.35 | 0.74 | 0.55        | 0.21        | 0.29        |
| 2-43772229        | 43772229        | T        | C        | 0.766        | 0.673        | 0.695        | 1.14        | 0.14         | 0.97        | 0.53        | 0.08        | 0.19         | 0.63 | 0.35 | 0.73 | 0.56        | 0.21        | 0.29        |
| 2-43772299        | 43772299        | A        | G        | 0.728        | 0.664        | 0.692        | 1.14        | 0.12         | 0.98        | 0.64        | 0.08        | 0.18         | 0.75 | 0.37 | 0.69 | 0.66        | 0.24        | 0.26        |
| 2-43772663        | 43772663        | G        | C        | 0.723        | 0.686        | 0.704        | 1.14        | 0.14         | 0.98        | 0.65        | 0.06        | 0.19         | 0.77 | 0.35 | 0.72 | 0.64        | 0.25        | 0.30        |
| 2-43773318        | 43773318        | T        | C        | 0.789        | 0.728        | 0.729        | 1.11        | 0.25         | 0.93        | 0.48        | 0.04        | 0.34         | 0.57 | 0.27 | 0.99 | 0.50        | 0.23        | 0.53        |
| 2-43773427        | 43773427        | C        | A        | 0.787        | 0.734        | 0.739        | 1.12        | 0.22         | 0.90        | 0.52        | 0.02        | 0.28         | 0.59 | 0.26 | 0.90 | 0.55        | 0.16        | 0.42        |
| 2-43773911        | 43773911        | A        | G        | 0.675        | 0.420        | 0.460        | 1.14        | 0.11         | 0.96        | 0.69        | 0.28        | 0.18         | 0.81 | 0.78 | 0.47 | 0.48        | 0.10        | 0.19        |
| 2-43774380        | 43774380        | G        | A        | 0.721        | 0.662        | 0.690        | 1.14        | 0.13         | 0.99        | 0.68        | 0.08        | 0.18         | 0.80 | 0.36 | 0.70 | 0.63        | 0.24        | 0.27        |
| 2-43774903        | 43774903        | T        | C        | 0.726        | 0.668        | 0.701        | 1.14        | 0.15         | 0.98        | 0.63        | 0.07        | 0.21         | 0.76 | 0.36 | 0.76 | 0.62        | 0.22        | 0.30        |
| 2-43775207        | 43775207        | A        | G        | 0.721        | 0.664        | 0.691        | 1.14        | 0.13         | 0.99        | 0.68        | 0.08        | 0.18         | 0.80 | 0.36 | 0.70 | 0.63        | 0.24        | 0.27        |
| 2-43775317        | 43775317        | C        | T        | 0.734        | 0.779        | 0.809        | 1.18        | 0.10         | 0.99        | 0.63        | 0.24        | 0.17         | 0.76 | 0.21 | 0.46 | 0.65        | 0.39        | 0.23        |
| 2-43775683        | 43775683        | T        | A        | 0.721        | 0.662        | 0.690        | 1.14        | 0.13         | 1.00        | 0.68        | 0.08        | 0.18         | 0.80 | 0.36 | 0.70 | 0.63        | 0.24        | 0.27        |
| rs6742108         | 43776853        | T        | C        | 0.731        | 0.779        | 0.805        | 1.18        | 0.11         | 0.97        | 0.64        | 0.24        | 0.18         | 0.77 | 0.21 | 0.49 | 0.66        | 0.39        | 0.25        |
| 2-43777082        | 43777082        | G        | A        | 0.723        | 0.684        | 0.704        | 1.14        | 0.13         | 0.98        | 0.67        | 0.06        | 0.19         | 0.79 | 0.35 | 0.69 | 0.64        | 0.24        | 0.29        |
| 2-43777108        | 43777108        | A        | G        | 0.731        | 0.779        | 0.806        | 1.19        | 0.092        | 1.00        | 0.64        | 0.24        | 0.15         | 0.77 | 0.21 | 0.42 | 0.66        | 0.39        | 0.21        |
| 2-43777654        | 43777654        | T        | A        | 0.723        | 0.679        | 0.703        | 1.14        | 0.14         | 0.99        | 0.67        | 0.06        | 0.19         | 0.79 | 0.33 | 0.71 | 0.64        | 0.25        | 0.30        |



|            |          |   |   |       |       |       |      |       |      |      |      |      |      |      |      |      |      |      |
|------------|----------|---|---|-------|-------|-------|------|-------|------|------|------|------|------|------|------|------|------|------|
| 2-43779665 | 43779665 | T | C | 0.721 | 0.661 | 0.690 | 1.14 | 0.13  | 1.00 | 0.68 | 0.08 | 0.18 | 0.80 | 0.36 | 0.71 | 0.63 | 0.23 | 0.27 |
| 2-43780105 | 43780105 | G | T | 0.721 | 0.664 | 0.690 | 1.14 | 0.13  | 0.99 | 0.68 | 0.09 | 0.18 | 0.80 | 0.37 | 0.71 | 0.63 | 0.23 | 0.27 |
| 2-43780461 | 43780461 | T | C | 0.721 | 0.661 | 0.690 | 1.14 | 0.13  | 1.00 | 0.68 | 0.08 | 0.18 | 0.80 | 0.36 | 0.71 | 0.63 | 0.23 | 0.27 |
| 2-43780942 | 43780942 | T | C | 0.723 | 0.659 | 0.690 | 1.14 | 0.13  | 0.99 | 0.69 | 0.08 | 0.18 | 0.79 | 0.36 | 0.71 | 0.62 | 0.23 | 0.28 |
| 2-43781360 | 43781360 | C | T | 0.723 | 0.682 | 0.704 | 1.14 | 0.14  | 0.98 | 0.67 | 0.06 | 0.19 | 0.79 | 0.34 | 0.72 | 0.64 | 0.24 | 0.30 |
| 2-43781453 | 43781453 | T | G | 0.726 | 0.682 | 0.704 | 1.14 | 0.14  | 0.98 | 0.68 | 0.06 | 0.20 | 0.78 | 0.34 | 0.72 | 0.63 | 0.24 | 0.30 |
| 2-43781826 | 43781826 | G | A | 0.726 | 0.682 | 0.704 | 1.14 | 0.14  | 0.98 | 0.68 | 0.06 | 0.20 | 0.78 | 0.34 | 0.72 | 0.63 | 0.24 | 0.30 |
| 2-43782563 | 43782563 | G | A | 0.726 | 0.682 | 0.704 | 1.14 | 0.14  | 0.98 | 0.68 | 0.06 | 0.20 | 0.78 | 0.34 | 0.72 | 0.63 | 0.24 | 0.30 |
| 2-43782868 | 43782868 | C | T | 0.726 | 0.682 | 0.703 | 1.14 | 0.14  | 0.99 | 0.68 | 0.06 | 0.19 | 0.78 | 0.34 | 0.72 | 0.63 | 0.24 | 0.30 |
| 2-43783141 | 43783141 | A | G | 0.723 | 0.657 | 0.674 | 1.09 | 0.30  | 0.99 | 0.69 | 0.09 | 0.39 | 0.79 | 0.35 | 0.90 | 0.62 | 0.23 | 0.59 |
| 2-43783241 | 43783241 | C | A | 0.726 | 0.677 | 0.702 | 1.13 | 0.17  | 0.98 | 0.68 | 0.06 | 0.23 | 0.78 | 0.34 | 0.81 | 0.63 | 0.26 | 0.36 |
| 2-43783273 | 43783273 | G | A | 0.726 | 0.675 | 0.687 | 1.09 | 0.32  | 0.98 | 0.68 | 0.07 | 0.41 | 0.78 | 0.33 | 0.90 | 0.63 | 0.25 | 0.64 |
| 2-43783294 | 43783294 | A | T | 0.726 | 0.675 | 0.687 | 1.09 | 0.32  | 0.98 | 0.68 | 0.07 | 0.41 | 0.78 | 0.33 | 0.90 | 0.63 | 0.25 | 0.64 |
| 2-43784203 | 43784203 | T | C | 0.723 | 0.653 | 0.674 | 1.09 | 0.30  | 0.99 | 0.69 | 0.08 | 0.39 | 0.79 | 0.34 | 0.90 | 0.62 | 0.24 | 0.59 |
| 2-43785802 | 43785802 | A | G | 0.726 | 0.661 | 0.688 | 1.13 | 0.16  | 0.99 | 0.68 | 0.09 | 0.22 | 0.78 | 0.38 | 0.81 | 0.63 | 0.23 | 0.33 |
| 2-43787576 | 43787576 | G | A | 0.728 | 0.681 | 0.698 | 1.11 | 0.24  | 0.97 | 0.67 | 0.07 | 0.33 | 0.78 | 0.35 | 0.99 | 0.63 | 0.25 | 0.50 |
| 2-43787758 | 43787758 | G | C | 0.728 | 0.681 | 0.698 | 1.11 | 0.24  | 0.97 | 0.67 | 0.07 | 0.33 | 0.78 | 0.35 | 0.99 | 0.63 | 0.25 | 0.50 |
| 2-43787999 | 43787999 | C | T | 0.728 | 0.681 | 0.698 | 1.11 | 0.24  | 0.97 | 0.67 | 0.07 | 0.33 | 0.78 | 0.35 | 0.99 | 0.63 | 0.25 | 0.50 |
| 2-43788092 | 43788092 | A | G | 0.728 | 0.681 | 0.698 | 1.11 | 0.24  | 0.97 | 0.67 | 0.07 | 0.33 | 0.78 | 0.35 | 0.99 | 0.63 | 0.25 | 0.50 |
| 2-43789231 | 43789231 | T | C | 0.685 | 0.288 | 0.327 | 1.03 | 0.75  | 0.99 | 0.79 | 0.23 | 0.93 | 0.94 | 0.58 | 0.11 | 0.56 | 0.09 | 0.96 |
| 2-43789786 | 43789786 | C | G | 0.721 | 0.661 | 0.686 | 1.11 | 0.22  | 0.97 | 0.66 | 0.08 | 0.31 | 0.80 | 0.35 | 0.98 | 0.65 | 0.22 | 0.45 |
| 2-43790259 | 43790259 | T | C | 0.721 | 0.655 | 0.669 | 1.07 | 0.41  | 0.98 | 0.66 | 0.09 | 0.53 | 0.80 | 0.35 | 0.72 | 0.65 | 0.23 | 0.77 |
| 2-43790347 | 43790347 | A | T | 0.721 | 0.661 | 0.683 | 1.11 | 0.23  | 0.98 | 0.66 | 0.09 | 0.31 | 0.80 | 0.38 | 0.99 | 0.65 | 0.23 | 0.46 |
| 2-43790448 | 43790448 | A | C | 0.731 | 0.777 | 0.802 | 1.14 | 0.20  | 0.98 | 0.63 | 0.24 | 0.34 | 0.77 | 0.22 | 0.72 | 0.69 | 0.40 | 0.50 |
| 2-43791363 | 43791363 | C | T | 0.685 | 0.414 | 0.468 | 1.15 | 0.080 | 0.99 | 0.79 | 0.38 | 0.14 | 0.94 | 0.85 | 0.47 | 0.56 | 0.10 | 0.14 |
| 2-43791563 | 43791563 | T | C | 0.721 | 0.655 | 0.674 | 1.09 | 0.31  | 0.99 | 0.66 | 0.09 | 0.40 | 0.80 | 0.35 | 0.89 | 0.65 | 0.23 | 0.60 |
| 2-43791766 | 43791766 | A | G | 0.721 | 0.661 | 0.689 | 1.13 | 0.16  | 0.99 | 0.66 | 0.09 | 0.22 | 0.80 | 0.38 | 0.81 | 0.65 | 0.23 | 0.33 |
| 2-43792538 | 43792538 | C | T | 0.726 | 0.682 | 0.704 | 1.13 | 0.16  | 0.98 | 0.64 | 0.07 | 0.23 | 0.78 | 0.35 | 0.80 | 0.64 | 0.25 | 0.35 |
| 2-43793119 | 43793119 | C | T | 0.728 | 0.686 | 0.710 | 1.12 | 0.19  | 0.98 | 0.67 | 0.06 | 0.25 | 0.78 | 0.35 | 0.84 | 0.63 | 0.24 | 0.40 |
| 2-43793222 | 43793222 | G | C | 0.728 | 0.681 | 0.703 | 1.13 | 0.17  | 0.98 | 0.67 | 0.07 | 0.23 | 0.78 | 0.35 | 0.81 | 0.63 | 0.25 | 0.36 |
| 2-43793725 | 43793725 | G | A | 0.728 | 0.681 | 0.703 | 1.13 | 0.17  | 0.98 | 0.67 | 0.07 | 0.23 | 0.78 | 0.35 | 0.81 | 0.63 | 0.25 | 0.36 |
| 2-43795076 | 43795076 | T | A | 0.756 | 0.653 | 0.689 | 1.14 | 0.12  | 0.98 | 0.50 | 0.07 | 0.17 | 0.63 | 0.36 | 0.68 | 0.47 | 0.23 | 0.26 |
| 2-43796478 | 43796478 | T | G | 0.731 | 0.775 | 0.807 | 1.17 | 0.13  | 0.99 | 0.63 | 0.24 | 0.21 | 0.77 | 0.22 | 0.54 | 0.69 | 0.40 | 0.30 |
| 2-43797619 | 43797619 | C | T | 0.736 | 0.779 | 0.807 | 1.17 | 0.13  | 0.99 | 0.64 | 0.24 | 0.21 | 0.75 | 0.22 | 0.54 | 0.66 | 0.39 | 0.30 |
| 2-43797710 | 43797710 | G | A | 0.728 | 0.679 | 0.704 | 1.13 | 0.17  | 0.98 | 0.67 | 0.06 | 0.24 | 0.78 | 0.34 | 0.82 | 0.63 | 0.25 | 0.36 |
| 2-43798053 | 43798053 | C | T | 0.728 | 0.677 | 0.703 | 1.13 | 0.17  | 0.98 | 0.67 | 0.06 | 0.24 | 0.78 | 0.34 | 0.82 | 0.63 | 0.26 | 0.37 |

|            |          |   |   |       |       |       |      |       |      |      |      |      |      |      |      |      |      |      |
|------------|----------|---|---|-------|-------|-------|------|-------|------|------|------|------|------|------|------|------|------|------|
| 2-43798616 | 43798616 | C | G | 0.723 | 0.677 | 0.704 | 1.13 | 0.17  | 0.98 | 0.65 | 0.06 | 0.24 | 0.79 | 0.34 | 0.82 | 0.66 | 0.26 | 0.36 |
| 2-43798792 | 43798792 | G | A | 0.728 | 0.679 | 0.705 | 1.12 | 0.19  | 0.98 | 0.67 | 0.06 | 0.26 | 0.78 | 0.34 | 0.87 | 0.63 | 0.25 | 0.40 |
| rs3752355  | 43799070 | C | T | 0.685 | 0.292 | 0.333 | 1.05 | 0.54  | 1.00 | 0.79 | 0.23 | 0.68 | 0.94 | 0.57 | 0.23 | 0.56 | 0.09 | 0.71 |
| 2-43799775 | 43799775 | T | C | 0.721 | 0.653 | 0.689 | 1.13 | 0.16  | 0.99 | 0.66 | 0.09 | 0.23 | 0.80 | 0.38 | 0.83 | 0.65 | 0.25 | 0.34 |
| 2-43800174 | 43800174 | A | G | 0.721 | 0.653 | 0.689 | 1.13 | 0.16  | 0.99 | 0.66 | 0.09 | 0.23 | 0.80 | 0.38 | 0.83 | 0.65 | 0.25 | 0.34 |
| 2-43800889 | 43800889 | T | C | 0.726 | 0.655 | 0.689 | 1.13 | 0.16  | 0.99 | 0.68 | 0.09 | 0.23 | 0.78 | 0.38 | 0.82 | 0.63 | 0.26 | 0.34 |
| 2-43801712 | 43801712 | A | G | 0.723 | 0.655 | 0.689 | 1.13 | 0.16  | 0.99 | 0.67 | 0.09 | 0.23 | 0.79 | 0.38 | 0.82 | 0.64 | 0.26 | 0.34 |
| 2-43802347 | 43802347 | T | A | 0.726 | 0.655 | 0.689 | 1.13 | 0.16  | 0.99 | 0.68 | 0.09 | 0.23 | 0.78 | 0.38 | 0.82 | 0.63 | 0.26 | 0.34 |
| 2-43802380 | 43802380 | C | G | 0.726 | 0.655 | 0.689 | 1.13 | 0.16  | 0.99 | 0.68 | 0.09 | 0.23 | 0.78 | 0.38 | 0.82 | 0.63 | 0.26 | 0.34 |
| 2-43802839 | 43802839 | A | C | 0.688 | 0.403 | 0.456 | 1.10 | 0.23  | 1.00 | 0.80 | 0.33 | 0.38 | 0.93 | 0.80 | 0.11 | 0.54 | 0.11 | 0.37 |
| 2-43803228 | 43803228 | T | A | 0.721 | 0.653 | 0.689 | 1.13 | 0.16  | 0.99 | 0.66 | 0.09 | 0.23 | 0.80 | 0.38 | 0.83 | 0.65 | 0.25 | 0.34 |
| 2-43803428 | 43803428 | T | C | 0.721 | 0.653 | 0.689 | 1.13 | 0.16  | 0.99 | 0.66 | 0.09 | 0.23 | 0.80 | 0.38 | 0.83 | 0.65 | 0.25 | 0.34 |
| 2-43803812 | 43803812 | A | G | 0.721 | 0.653 | 0.689 | 1.13 | 0.16  | 0.99 | 0.66 | 0.09 | 0.23 | 0.80 | 0.38 | 0.83 | 0.65 | 0.25 | 0.34 |
| 2-43803897 | 43803897 | A | C | 0.721 | 0.653 | 0.689 | 1.13 | 0.16  | 0.99 | 0.66 | 0.09 | 0.23 | 0.80 | 0.38 | 0.83 | 0.65 | 0.25 | 0.34 |
| 2-43804229 | 43804229 | T | C | 0.721 | 0.653 | 0.689 | 1.13 | 0.16  | 0.99 | 0.66 | 0.09 | 0.23 | 0.80 | 0.38 | 0.83 | 0.65 | 0.25 | 0.34 |
| 2-43806093 | 43806093 | C | G | 0.723 | 0.661 | 0.689 | 1.13 | 0.16  | 0.99 | 0.65 | 0.09 | 0.23 | 0.77 | 0.39 | 0.82 | 0.62 | 0.24 | 0.34 |
| 2-43806172 | 43806172 | C | T | 0.741 | 0.779 | 0.807 | 1.17 | 0.12  | 0.99 | 0.58 | 0.26 | 0.21 | 0.71 | 0.25 | 0.53 | 0.62 | 0.41 | 0.29 |
| 2-43806372 | 43806372 | A | G | 0.688 | 0.407 | 0.450 | 1.11 | 0.19  | 1.00 | 0.78 | 0.34 | 0.32 | 0.90 | 0.82 | 0.13 | 0.52 | 0.11 | 0.31 |
| 2-43806382 | 43806382 | C | T | 0.688 | 0.412 | 0.464 | 1.14 | 0.10  | 1.00 | 0.78 | 0.33 | 0.17 | 0.90 | 0.84 | 0.31 | 0.52 | 0.10 | 0.17 |
| 2-43807368 | 43807368 | C | G | 0.718 | 0.653 | 0.688 | 1.13 | 0.16  | 0.99 | 0.65 | 0.09 | 0.23 | 0.79 | 0.38 | 0.82 | 0.65 | 0.25 | 0.34 |
| rs10179648 | 43808065 | C | T | 0.685 | 0.296 | 0.333 | 1.05 | 0.59  | 1.00 | 0.73 | 0.23 | 0.75 | 0.85 | 0.57 | 0.20 | 0.48 | 0.08 | 0.77 |
| 2-43809513 | 43809513 | G | A | 0.734 | 0.779 | 0.806 | 1.17 | 0.12  | 0.99 | 0.56 | 0.26 | 0.20 | 0.68 | 0.25 | 0.52 | 0.59 | 0.41 | 0.29 |
| 2-43812716 | 43812716 | T | A | 0.726 | 0.675 | 0.698 | 1.12 | 0.19  | 0.96 | 0.58 | 0.07 | 0.25 | 0.70 | 0.36 | 0.88 | 0.54 | 0.18 | 0.38 |
| 2-43812831 | 43812831 | A | G | 0.721 | 0.659 | 0.689 | 1.13 | 0.16  | 0.99 | 0.60 | 0.10 | 0.23 | 0.72 | 0.39 | 0.82 | 0.57 | 0.25 | 0.34 |
| 2-43815829 | 43815829 | C | T | 0.731 | 0.777 | 0.806 | 1.17 | 0.12  | 0.99 | 0.57 | 0.27 | 0.20 | 0.69 | 0.25 | 0.52 | 0.60 | 0.42 | 0.29 |
| 2-43818480 | 43818480 | C | T | 0.723 | 0.661 | 0.689 | 1.13 | 0.16  | 0.99 | 0.61 | 0.10 | 0.23 | 0.73 | 0.38 | 0.82 | 0.58 | 0.25 | 0.34 |
| 2-43820549 | 43820549 | A | T | 0.734 | 0.777 | 0.806 | 1.17 | 0.12  | 0.99 | 0.58 | 0.27 | 0.20 | 0.70 | 0.25 | 0.52 | 0.61 | 0.42 | 0.29 |
| 2-43821186 | 43821186 | T | G | 0.734 | 0.777 | 0.806 | 1.17 | 0.12  | 0.99 | 0.58 | 0.27 | 0.20 | 0.70 | 0.25 | 0.52 | 0.61 | 0.42 | 0.29 |
| 2-43821489 | 43821489 | C | T | 0.734 | 0.777 | 0.806 | 1.17 | 0.12  | 0.99 | 0.58 | 0.27 | 0.20 | 0.70 | 0.25 | 0.52 | 0.61 | 0.42 | 0.29 |
| 2-43822518 | 43822518 | C | A | 0.731 | 0.777 | 0.806 | 1.17 | 0.12  | 0.99 | 0.57 | 0.27 | 0.20 | 0.69 | 0.25 | 0.52 | 0.60 | 0.42 | 0.29 |
| 2-43826080 | 43826080 | A | C | 0.718 | 0.777 | 0.806 | 1.17 | 0.12  | 0.99 | 0.52 | 0.27 | 0.20 | 0.65 | 0.25 | 0.51 | 0.58 | 0.42 | 0.28 |
| 2-43827697 | 43827697 | C | T | 0.777 | 0.819 | 0.832 | 1.12 | 0.31  | 0.97 | 0.50 | 0.20 | 0.50 | 0.54 | 0.19 | 0.93 | 0.78 | 0.49 | 0.81 |
| 2-43829540 | 43829540 | T | C | 0.683 | 0.416 | 0.452 | 1.11 | 0.21  | 0.99 | 0.69 | 0.32 | 0.35 | 0.73 | 0.79 | 0.14 | 0.49 | 0.08 | 0.32 |
| 2-43832116 | 43832116 | G | A | 0.744 | 0.790 | 0.816 | 1.17 | 0.13  | 0.99 | 0.60 | 0.24 | 0.21 | 0.65 | 0.23 | 0.51 | 0.64 | 0.33 | 0.29 |
| 2-43832300 | 43832300 | A | T | 0.739 | 0.792 | 0.815 | 1.17 | 0.12  | 0.99 | 0.58 | 0.24 | 0.20 | 0.63 | 0.23 | 0.50 | 0.63 | 0.33 | 0.28 |
| rs7558302  | 43836687 | C | T | 0.680 | 0.425 | 0.469 | 1.15 | 0.089 | 0.97 | 0.66 | 0.31 | 0.15 | 0.72 | 0.81 | 0.48 | 0.47 | 0.07 | 0.14 |

2-43840813 43840813 C G 0.744 0.788 0.810 1.15 0.18 0.99 0.55 0.25 0.29 0.60 0.24 0.67 0.57 0.35 0.43

**c) 9q33**

| SNP         | Position  | Allele |       | Frequency |        |         | OR    | P     | Info | Conditional on rs10986105 |              |      | Conditional on rs10818854 |              |      | Conditional on rs2479106 |              |       |
|-------------|-----------|--------|-------|-----------|--------|---------|-------|-------|------|---------------------------|--------------|------|---------------------------|--------------|------|--------------------------|--------------|-------|
|             |           | Effect | Other | China     | Europe | Iceland |       |       |      | China $r^2$               | Europe $r^2$ | P    | China $r^2$               | Europe $r^2$ | P    | China $r^2$              | Europe $r^2$ | P     |
|             |           |        |       |           |        |         |       |       |      |                           |              |      |                           |              |      |                          |              |       |
| 9-126263444 | 126263444 | A      | G     | 0.046     | 0.000  | 0.002   | 31.96 | 0.034 | 0.27 | 0.57                      | 1.00         | 0.58 | 0.60                      | 1.00         | 0.46 | 0.15                     | 1.00         | 0.08  |
| 9-126287404 | 126287404 | A      | G     | 0.096     | 0.066  | 0.056   | 1.22  | 0.28  | 0.95 | 0.50                      | 0.27         | 0.84 | 0.55                      | 0.44         | 0.58 | 0.16                     | 0.17         | 0.48  |
| 9-126288295 | 126288295 | T      | A     | 0.086     | 0.066  | 0.054   | 1.17  | 0.37  | 0.99 | 0.51                      | 0.27         | 0.69 | 0.62                      | 0.44         | 0.43 | 0.16                     | 0.17         | 0.62  |
| 9-126296972 | 126296972 | T      | C     | 0.061     | 0.038  | 0.030   | 1.60  | 0.048 | 0.99 | 0.66                      | 0.50         | 0.85 | 0.79                      | 0.83         | 0.79 | 0.15                     | 0.06         | 0.089 |
| 9-126297578 | 126297578 | C      | A     | 0.086     | 0.068  | 0.054   | 1.17  | 0.37  | 1.00 | 0.51                      | 0.27         | 0.70 | 0.62                      | 0.42         | 0.44 | 0.16                     | 0.17         | 0.62  |
| 9-126299078 | 126299078 | T      | G     | 0.086     | 0.068  | 0.054   | 1.17  | 0.37  | 1.00 | 0.51                      | 0.27         | 0.70 | 0.62                      | 0.42         | 0.44 | 0.16                     | 0.17         | 0.61  |
| 9-126301563 | 126301563 | G      | C     | 0.086     | 0.068  | 0.054   | 1.18  | 0.36  | 1.00 | 0.51                      | 0.27         | 0.71 | 0.62                      | 0.42         | 0.44 | 0.16                     | 0.17         | 0.61  |
| 9-126302723 | 126302723 | A      | G     | 0.086     | 0.066  | 0.054   | 1.18  | 0.36  | 1.00 | 0.51                      | 0.27         | 0.71 | 0.62                      | 0.44         | 0.44 | 0.16                     | 0.17         | 0.61  |
| 9-126304695 | 126304695 | G      | T     | 0.089     | 0.066  | 0.054   | 1.17  | 0.37  | 0.99 | 0.50                      | 0.27         | 0.69 | 0.60                      | 0.44         | 0.43 | 0.15                     | 0.17         | 0.62  |
| 9-126305042 | 126305042 | A      | G     | 0.086     | 0.066  | 0.054   | 1.17  | 0.37  | 1.00 | 0.51                      | 0.27         | 0.69 | 0.62                      | 0.44         | 0.43 | 0.16                     | 0.17         | 0.62  |
| 9-126306290 | 126306290 | C      | A     | 0.061     | 0.038  | 0.030   | 1.60  | 0.047 | 1.00 | 0.66                      | 0.50         | 0.84 | 0.79                      | 0.83         | 0.80 | 0.15                     | 0.06         | 0.088 |
| 9-126306381 | 126306381 | G      | A     | 0.061     | 0.038  | 0.030   | 1.60  | 0.047 | 1.00 | 0.66                      | 0.50         | 0.84 | 0.79                      | 0.83         | 0.80 | 0.15                     | 0.06         | 0.088 |
| 9-126309977 | 126309977 | C      | T     | 0.066     | 0.038  | 0.030   | 1.59  | 0.049 | 1.00 | 0.60                      | 0.50         | 0.85 | 0.80                      | 0.83         | 0.79 | 0.13                     | 0.06         | 0.090 |
| 9-126315526 | 126315526 | A      | G     | 0.066     | 0.040  | 0.030   | 1.59  | 0.050 | 1.00 | 0.60                      | 0.48         | 0.86 | 0.80                      | 0.78         | 0.78 | 0.13                     | 0.06         | 0.092 |
| 9-126316939 | 126316939 | C      | T     | 0.066     | 0.040  | 0.030   | 1.59  | 0.050 | 1.00 | 0.60                      | 0.48         | 0.85 | 0.80                      | 0.78         | 0.78 | 0.13                     | 0.06         | 0.092 |
| 9-126317882 | 126317882 | C      | T     | 0.066     | 0.038  | 0.030   | 1.59  | 0.049 | 1.00 | 0.60                      | 0.50         | 0.84 | 0.80                      | 0.83         | 0.79 | 0.13                     | 0.06         | 0.090 |
| 9-126321003 | 126321003 | T      | C     | 0.066     | 0.038  | 0.030   | 1.59  | 0.049 | 1.00 | 0.60                      | 0.50         | 0.84 | 0.80                      | 0.83         | 0.79 | 0.13                     | 0.06         | 0.090 |
| 9-126324375 | 126324375 | G      | A     | 0.066     | 0.038  | 0.030   | 1.59  | 0.049 | 1.00 | 0.60                      | 0.50         | 0.85 | 0.80                      | 0.83         | 0.78 | 0.13                     | 0.06         | 0.090 |
| 9-126324514 | 126324514 | C      | T     | 0.066     | 0.038  | 0.030   | 1.59  | 0.049 | 1.00 | 0.60                      | 0.50         | 0.85 | 0.80                      | 0.83         | 0.78 | 0.13                     | 0.06         | 0.091 |
| 9-126328698 | 126328698 | T      | C     | 0.066     | 0.038  | 0.030   | 1.59  | 0.049 | 1.00 | 0.60                      | 0.50         | 0.85 | 0.80                      | 0.83         | 0.78 | 0.13                     | 0.06         | 0.090 |
| 9-126333938 | 126333938 | T      | A     | 0.066     | 0.038  | 0.030   | 1.59  | 0.049 | 1.00 | 0.60                      | 0.50         | 0.85 | 0.80                      | 0.83         | 0.78 | 0.13                     | 0.06         | 0.091 |
| 9-126334347 | 126334347 | G      | A     | 0.066     | 0.038  | 0.030   | 1.59  | 0.049 | 1.00 | 0.60                      | 0.50         | 0.85 | 0.80                      | 0.83         | 0.78 | 0.13                     | 0.06         | 0.091 |
| 9-126335458 | 126335458 | C      | T     | 0.066     | 0.038  | 0.030   | 1.59  | 0.050 | 1.00 | 0.60                      | 0.50         | 0.85 | 0.80                      | 0.83         | 0.78 | 0.13                     | 0.06         | 0.091 |
| 9-126335518 | 126335518 | C      | T     | 0.066     | 0.038  | 0.030   | 1.59  | 0.050 | 1.00 | 0.60                      | 0.50         | 0.85 | 0.80                      | 0.83         | 0.78 | 0.13                     | 0.06         | 0.091 |
| 9-126336188 | 126336188 | G      | C     | 0.066     | 0.038  | 0.030   | 1.59  | 0.050 | 1.00 | 0.60                      | 0.50         | 0.85 | 0.80                      | 0.83         | 0.78 | 0.13                     | 0.06         | 0.091 |
| 9-126336740 | 126336740 | T      | G     | 0.066     | 0.038  | 0.030   | 1.59  | 0.050 | 1.00 | 0.60                      | 0.50         | 0.85 | 0.80                      | 0.83         | 0.78 | 0.13                     | 0.06         | 0.091 |
| 9-126337149 | 126337149 | C      | T     | 0.066     | 0.038  | 0.030   | 1.59  | 0.049 | 1.00 | 0.60                      | 0.50         | 0.85 | 0.80                      | 0.83         | 0.78 | 0.13                     | 0.06         | 0.091 |
| 9-126337696 | 126337696 | G      | A     | 0.066     | 0.038  | 0.030   | 1.59  | 0.049 | 1.00 | 0.60                      | 0.50         | 0.85 | 0.80                      | 0.83         | 0.78 | 0.13                     | 0.06         | 0.091 |
| 9-126341743 | 126341743 | C      | G     | 0.066     | 0.038  | 0.030   | 1.59  | 0.051 | 0.99 | 0.60                      | 0.50         | 0.86 | 0.80                      | 0.83         | 0.77 | 0.13                     | 0.06         | 0.093 |

|             |           |   |   |       |       |       |       |       |      |      |      |      |      |      |      |      |      |       |
|-------------|-----------|---|---|-------|-------|-------|-------|-------|------|------|------|------|------|------|------|------|------|-------|
| 9-126344742 | 126344742 | A | G | 0.066 | 0.038 | 0.030 | 1.59  | 0.049 | 1.00 | 0.60 | 0.50 | 0.85 | 0.80 | 0.83 | 0.78 | 0.13 | 0.06 | 0.091 |
| 9-126345120 | 126345120 | A | C | 0.221 | 0.367 | 0.319 | 1.06  | 0.51  | 1.00 | 0.14 | 0.04 | 1.00 | 0.18 | 0.06 | 0.92 | 0.56 | 0.42 | 0.95  |
| 9-126345893 | 126345893 | G | T | 0.241 | 0.363 | 0.321 | 1.04  | 0.61  | 1.00 | 0.11 | 0.04 | 0.89 | 0.15 | 0.06 | 0.80 | 0.58 | 0.43 | 0.80  |
| 9-126346702 | 126346702 | A | G | 0.066 | 0.040 | 0.030 | 1.59  | 0.049 | 1.00 | 0.60 | 0.48 | 0.85 | 0.80 | 0.78 | 0.78 | 0.13 | 0.06 | 0.091 |
| 9-126348599 | 126348599 | A | G | 0.066 | 0.040 | 0.030 | 1.59  | 0.049 | 1.00 | 0.60 | 0.48 | 0.85 | 0.80 | 0.78 | 0.78 | 0.13 | 0.06 | 0.091 |
| 9-126351313 | 126351313 | G | C | 0.086 | 0.075 | 0.064 | 1.19  | 0.29  | 1.00 | 0.51 | 0.22 | 0.92 | 0.62 | 0.36 | 0.66 | 0.24 | 0.20 | 0.53  |
| 9-126352218 | 126352218 | A | G | 0.091 | 0.088 | 0.063 | 1.13  | 0.45  | 1.00 | 0.43 | 0.19 | 0.67 | 0.59 | 0.31 | 0.42 | 0.28 | 0.16 | 0.73  |
| 9-126352551 | 126352551 | G | A | 0.246 | 0.363 | 0.323 | 1.04  | 0.61  | 0.99 | 0.10 | 0.04 | 0.89 | 0.13 | 0.06 | 0.80 | 0.58 | 0.43 | 0.79  |
| 9-126352970 | 126352970 | A | C | 0.066 | 0.040 | 0.030 | 1.59  | 0.049 | 1.00 | 0.60 | 0.48 | 0.85 | 0.80 | 0.78 | 0.78 | 0.13 | 0.06 | 0.091 |
| 9-126353327 | 126353327 | C | T | 0.239 | 0.363 | 0.322 | 1.05  | 0.60  | 1.00 | 0.11 | 0.04 | 0.91 | 0.15 | 0.06 | 0.82 | 0.59 | 0.43 | 0.81  |
| 9-126360328 | 126360328 | G | A | 0.226 | 0.348 | 0.311 | 1.07  | 0.45  | 0.97 | 0.11 | 0.05 | 0.93 | 0.17 | 0.07 | 0.99 | 0.63 | 0.41 | 0.94  |
| 9-126363791 | 126363791 | A | C | 0.064 | 0.040 | 0.030 | 1.59  | 0.05  | 0.99 | 0.56 | 0.48 | 0.86 | 0.76 | 0.78 | 0.76 | 0.12 | 0.05 | 0.092 |
| 9-126364306 | 126364306 | T | C | 0.064 | 0.040 | 0.030 | 1.59  | 0.05  | 0.99 | 0.56 | 0.48 | 0.87 | 0.76 | 0.78 | 0.74 | 0.12 | 0.05 | 0.10  |
| 9-126366529 | 126366529 | C | T | 0.223 | 0.363 | 0.320 | 1.06  | 0.50  | 1.00 | 0.10 | 0.04 | 0.98 | 0.15 | 0.06 | 0.94 | 0.61 | 0.42 | 0.96  |
| 9-126366539 | 126366539 | A | C | 0.223 | 0.363 | 0.320 | 1.06  | 0.50  | 1.00 | 0.10 | 0.04 | 0.98 | 0.15 | 0.06 | 0.94 | 0.61 | 0.42 | 0.96  |
| 9-126367435 | 126367435 | T | G | 0.221 | 0.363 | 0.320 | 1.06  | 0.50  | 1.00 | 0.08 | 0.04 | 0.98 | 0.15 | 0.06 | 0.94 | 0.60 | 0.42 | 0.96  |
| 9-126368420 | 126368420 | A | T | 0.061 | 0.040 | 0.030 | 1.59  | 0.052 | 0.98 | 0.53 | 0.48 | 0.88 | 0.79 | 0.78 | 0.74 | 0.11 | 0.05 | 0.10  |
| 9-126378018 | 126378018 | A | G | 0.061 | 0.038 | 0.029 | 1.59  | 0.051 | 0.99 | 0.53 | 0.50 | 0.88 | 0.79 | 0.83 | 0.74 | 0.11 | 0.06 | 0.093 |
| 9-126380439 | 126380439 | G | A | 0.239 | 0.365 | 0.322 | 1.05  | 0.54  | 1.00 | 0.08 | 0.04 | 0.98 | 0.15 | 0.06 | 0.89 | 0.55 | 0.42 | 0.90  |
| 9-126387151 | 126387151 | A | G | 0.041 | 0.000 | 0.002 | 93.35 | 0.012 | 0.24 | 0.64 | 1.00 | 0.52 | 0.67 | 1.00 | 0.41 | 0.18 | 1.00 | 0.040 |
| 9-126387468 | 126387468 | G | A | 0.066 | 0.038 | 0.029 | 1.60  | 0.049 | 0.99 | 0.60 | 0.50 | 0.87 | 0.80 | 0.83 | 0.74 | 0.13 | 0.06 | 0.090 |
| 9-126390741 | 126390741 | T | C | 0.038 | 0.000 | 0.002 | 91.55 | 0.012 | 0.24 | 0.60 | 1.00 | 0.52 | 0.63 | 1.00 | 0.41 | 0.18 | 1.00 | 0.040 |
| 9-126391268 | 126391268 | G | T | 0.251 | 0.361 | 0.323 | 1.05  | 0.56  | 0.99 | 0.08 | 0.04 | 0.95 | 0.15 | 0.06 | 0.86 | 0.54 | 0.44 | 0.86  |
| 9-126391286 | 126391286 | A | G | 0.038 | 0.000 | 0.002 | 91.12 | 0.012 | 0.24 | 0.60 | 1.00 | 0.52 | 0.63 | 1.00 | 0.41 | 0.18 | 1.00 | 0.040 |
| 9-126393626 | 126393626 | C | T | 0.061 | 0.047 | 0.031 | 1.76  | 0.016 | 0.96 | 0.53 | 0.39 | 0.51 | 0.79 | 0.65 | 0.69 | 0.11 | 0.07 | 0.034 |
| 9-126394186 | 126394186 | C | G | 0.272 | 0.363 | 0.329 | 1.05  | 0.60  | 0.97 | 0.05 | 0.04 | 0.91 | 0.11 | 0.06 | 0.82 | 0.52 | 0.44 | 0.81  |
| 9-126394539 | 126394539 | T | A | 0.206 | 0.363 | 0.321 | 1.05  | 0.53  | 1.00 | 0.09 | 0.04 | 0.98 | 0.16 | 0.06 | 0.90 | 0.72 | 0.44 | 0.91  |
| 9-126394637 | 126394637 | A | T | 0.178 | 0.316 | 0.288 | 1.09  | 0.32  | 1.00 | 0.12 | 0.05 | 0.77 | 0.20 | 0.08 | 0.84 | 0.57 | 0.28 | 0.65  |
| 9-126395185 | 126395185 | T | A | 0.173 | 0.283 | 0.248 | 1.19  | 0.059 | 0.98 | 0.13 | 0.07 | 0.26 | 0.22 | 0.09 | 0.29 | 0.54 | 0.20 | 0.12  |
| 9-126395188 | 126395188 | T | A | 0.208 | 0.361 | 0.321 | 1.05  | 0.54  | 1.00 | 0.09 | 0.04 | 0.97 | 0.16 | 0.06 | 0.88 | 0.71 | 0.44 | 0.89  |
| 9-126395609 | 126395609 | T | C | 0.061 | 0.036 | 0.029 | 1.60  | 0.049 | 0.99 | 0.53 | 0.46 | 0.88 | 0.79 | 0.78 | 0.72 | 0.11 | 0.06 | 0.091 |
| 9-126395781 | 126395781 | A | C | 0.206 | 0.361 | 0.321 | 1.05  | 0.55  | 1.00 | 0.09 | 0.04 | 0.97 | 0.16 | 0.06 | 0.88 | 0.72 | 0.44 | 0.89  |
| 9-126396042 | 126396042 | G | A | 0.211 | 0.361 | 0.322 | 1.05  | 0.58  | 1.00 | 0.09 | 0.04 | 0.93 | 0.15 | 0.06 | 0.84 | 0.70 | 0.44 | 0.83  |
| 9-126396606 | 126396606 | C | A | 0.183 | 0.314 | 0.289 | 1.09  | 0.35  | 1.00 | 0.11 | 0.05 | 0.81 | 0.20 | 0.08 | 0.89 | 0.55 | 0.28 | 0.70  |
| 9-126396659 | 126396659 | A | G | 0.211 | 0.361 | 0.322 | 1.05  | 0.58  | 1.00 | 0.09 | 0.04 | 0.92 | 0.15 | 0.06 | 0.83 | 0.70 | 0.44 | 0.83  |
| 9-126397433 | 126397433 | T | C | 0.195 | 0.361 | 0.320 | 1.06  | 0.51  | 1.00 | 0.10 | 0.04 | 1.00 | 0.17 | 0.06 | 0.92 | 0.76 | 0.44 | 0.94  |

|                   |                  |          |          |              |              |              |             |               |             |             |             |             |      |      |      |             |             |              |
|-------------------|------------------|----------|----------|--------------|--------------|--------------|-------------|---------------|-------------|-------------|-------------|-------------|------|------|------|-------------|-------------|--------------|
| 9-126397618       | 126397618        | A        | T        | 0.206        | 0.359        | 0.321        | 1.05        | 0.54          | 1.00        | 0.09        | 0.04        | 0.98        | 0.16 | 0.07 | 0.89 | 0.72        | 0.44        | 0.90         |
| 9-126397776       | 126397776        | A        | T        | 0.206        | 0.359        | 0.321        | 1.05        | 0.54          | 1.00        | 0.09        | 0.04        | 0.98        | 0.16 | 0.07 | 0.89 | 0.72        | 0.44        | 0.90         |
| rs1475528         | 126400092        | C        | T        | 0.168        | 0.314        | 0.290        | 1.09        | 0.34          | 0.99        | 0.13        | 0.05        | 0.81        | 0.23 | 0.08 | 0.88 | 0.62        | 0.28        | 0.70         |
| 9-126403335       | 126403335        | C        | G        | 0.201        | 0.354        | 0.312        | 1.07        | 0.42          | 1.00        | 0.11        | 0.05        | 0.90        | 0.17 | 0.07 | 0.98 | 0.79        | 0.45        | 0.92         |
| 9-126403866       | 126403866        | A        | G        | 0.198        | 0.352        | 0.312        | 1.07        | 0.42          | 1.00        | 0.10        | 0.05        | 0.89        | 0.17 | 0.07 | 0.97 | 0.78        | 0.46        | 0.92         |
| 9-126405933       | 126405933        | C        | G        | 0.056        | 0.044        | 0.038        | 1.75        | 0.0080        | 0.99        | 0.65        | 0.65        | 0.72        | 0.86 | 0.96 | 0.46 | 0.14        | 0.08        | 0.018        |
| 9-126412353       | 126412353        | A        | C        | 0.058        | 0.044        | 0.038        | 1.75        | 0.008         | 0.99        | 0.69        | 0.65        | 0.72        | 0.91 | 0.96 | 0.44 | 0.14        | 0.08        | 0.018        |
| 9-126415689       | 126415689        | G        | A        | 0.213        | 0.359        | 0.312        | 1.06        | 0.49          | 0.99        | 0.11        | 0.04        | 0.98        | 0.17 | 0.07 | 0.97 | 0.76        | 0.46        | 0.96         |
| 9-126417340       | 126417340        | T        | C        | 0.201        | 0.358        | 0.310        | 1.08        | 0.39          | 1.00        | 0.13        | 0.05        | 0.84        | 0.19 | 0.07 | 0.92 | 0.82        | 0.46        | 0.85         |
| 9-126426427       | 126426427        | C        | T        | 0.180        | 0.329        | 0.296        | 1.08        | 0.37          | 1.00        | 0.16        | 0.05        | 0.84        | 0.23 | 0.08 | 0.91 | 0.63        | 0.34        | 0.78         |
| 9-126432448       | 126432448        | C        | T        | 0.213        | 0.358        | 0.312        | 1.07        | 0.44          | 1.00        | 0.11        | 0.05        | 0.91        | 0.17 | 0.07 | 0.99 | 0.76        | 0.46        | 0.95         |
| 9-126433214       | 126433214        | C        | T        | 0.213        | 0.358        | 0.312        | 1.07        | 0.44          | 1.00        | 0.11        | 0.05        | 0.91        | 0.17 | 0.07 | 0.99 | 0.76        | 0.46        | 0.95         |
| rs913783          | 126434103        | G        | A        | 0.213        | 0.359        | 0.314        | 1.07        | 0.46          | 0.99        | 0.11        | 0.04        | 0.96        | 0.17 | 0.07 | 0.97 | 0.76        | 0.46        | 1.00         |
| 9-126435819       | 126435819        | T        | A        | 0.206        | 0.359        | 0.311        | 1.07        | 0.42          | 1.00        | 0.11        | 0.04        | 0.88        | 0.18 | 0.07 | 0.96 | 0.77        | 0.46        | 0.91         |
| 9-126440559       | 126440559        | T        | C        | 0.056        | 0.046        | 0.030        | 2.14        | 0.0022        | 0.86        | 0.65        | 0.70        | 0.43        | 0.95 | 1.00 | 0.16 | 0.14        | 0.08        | 0.0058       |
| 9-126441397       | 126441397        | A        | G        | 0.208        | 0.358        | 0.312        | 1.07        | 0.44          | 1.00        | 0.11        | 0.05        | 0.91        | 0.18 | 0.07 | 0.99 | 0.76        | 0.45        | 0.95         |
| 9-126442244       | 126442244        | C        | G        | 0.056        | 0.046        | 0.036        | 1.76        | 0.0084        | 0.98        | 0.65        | 0.70        | 0.78        | 0.95 | 1.00 | 0.48 | 0.14        | 0.08        | 0.019        |
| 9-126442550       | 126442550        | G        | A        | 0.195        | 0.358        | 0.311        | 1.07        | 0.40          | 1.00        | 0.12        | 0.05        | 0.87        | 0.20 | 0.07 | 0.95 | 0.81        | 0.45        | 0.89         |
| 9-126442740       | 126442740        | T        | C        | 0.150        | 0.294        | 0.260        | 1.11        | 0.24          | 0.99        | 0.18        | 0.06        | 0.69        | 0.30 | 0.09 | 0.74 | 0.55        | 0.18        | 0.48         |
| 9-126443314       | 126443314        | C        | T        | 0.056        | 0.047        | 0.038        | 1.66        | 0.015         | 0.99        | 0.65        | 0.67        | 0.93        | 0.95 | 0.96 | 0.81 | 0.14        | 0.08        | 0.033        |
| 9-126443959       | 126443959        | T        | C        | 0.195        | 0.347        | 0.303        | 1.08        | 0.40          | 0.96        | 0.12        | 0.05        | 0.89        | 0.20 | 0.07 | 0.96 | 0.81        | 0.47        | 0.91         |
| 9-126445525       | 126445525        | T        | C        | 0.056        | 0.046        | 0.036        | 1.74        | 0.0094        | 1.00        | 0.65        | 0.70        | 0.83        | 0.95 | 1.00 | 0.81 | 0.14        | 0.08        | 0.021        |
| <b>rs10818854</b> | <b>126446778</b> | <b>A</b> | <b>G</b> | <b>0.053</b> | <b>0.046</b> | <b>0.037</b> | <b>1.73</b> | <b>0.0100</b> | <b>0.98</b> | <b>0.68</b> | <b>0.70</b> | <b>0.86</b> | -    | -    | -    | <b>0.15</b> | <b>0.08</b> | <b>0.023</b> |
| 9-126451986       | 126451986        | T        | C        | 0.051        | 0.035        | 0.029        | 2.06        | 0.004         | 0.91        | 0.72        | 0.95        | 0.76        | 0.95 | 0.74 | 0.30 | 0.16        | 0.08        | 0.0089       |
| 9-126452004       | 126452004        | C        | T        | 0.051        | 0.046        | 0.036        | 1.75        | 0.0089        | 1.00        | 0.72        | 0.70        | 0.83        | 0.95 | 1.00 | 0.72 | 0.16        | 0.08        | 0.020        |
| 9-126452936       | 126452936        | T        | C        | 0.188        | 0.256        | 0.225        | 1.10        | 0.320         | 0.99        | 0.15        | 0.07        | 0.91        | 0.17 | 0.11 | 0.96 | 0.91        | 0.89        | 0.93         |
| 9-126453379       | 126453379        | C        | G        | 0.053        | 0.046        | 0.036        | 1.70        | 0.012         | 1.00        | 0.76        | 0.70        | 0.98        | 0.91 | 1.00 | 0.90 | 0.17        | 0.08        | 0.027        |
| 9-126453684       | 126453684        | A        | G        | 0.165        | 0.190        | 0.172        | 1.25        | 0.035         | 1.00        | 0.20        | 0.12        | 0.27        | 0.22 | 0.16 | 0.27 | 0.81        | 0.60        | 0.056        |
| 9-126456280       | 126456280        | A        | T        | 0.056        | 0.046        | 0.036        | 1.69        | 0.013         | 1.00        | 0.80        | 0.70        | 0.99        | 0.86 | 1.00 | 0.83 | 0.18        | 0.08        | 0.029        |
| 9-126456729       | 126456729        | A        | G        | 0.056        | 0.046        | 0.037        | 1.69        | 0.013         | 1.00        | 0.80        | 0.70        | 0.98        | 0.86 | 1.00 | 0.81 | 0.18        | 0.08        | 0.029        |
| 9-126458565       | 126458565        | G        | A        | 0.165        | 0.201        | 0.178        | 1.23        | 0.051         | 1.00        | 0.20        | 0.11        | 0.34        | 0.22 | 0.17 | 0.34 | 0.81        | 0.55        | 0.092        |
| rs10760297        | 126458789        | G        | A        | 0.165        | 0.201        | 0.176        | 1.25        | 0.038         | 0.97        | 0.20        | 0.11        | 0.26        | 0.22 | 0.17 | 0.28 | 0.81        | 0.55        | 0.063        |
| 9-126462011       | 126462011        | C        | G        | 0.891        | 0.843        | 0.859        | 0.91        | 0.42          | 1.00        | 0.02        | 0.01        | 0.30        | 0.01 | 0.01 | 0.32 | 0.54        | 0.41        | 0.87         |
| 9-126462080       | 126462080        | G        | A        | 0.201        | 0.266        | 0.229        | 1.09        | 0.38          | 1.00        | 0.13        | 0.06        | 0.99        | 0.15 | 0.11 | 0.95 | 0.84        | 0.81        | 0.89         |
| 9-126462207       | 126462207        | C        | A        | 0.891        | 0.843        | 0.859        | 0.91        | 0.42          | 1.00        | 0.02        | 0.01        | 0.30        | 0.01 | 0.01 | 0.32 | 0.54        | 0.41        | 0.87         |
| 9-126462707       | 126462707        | T        | G        | 0.855        | 0.799        | 0.823        | 0.99        | 0.90          | 0.99        | 0.02        | 0.01        | 0.72        | 0.02 | 0.01 | 0.75 | 0.55        | 0.59        | 0.30         |

|             |           |   |   |       |       |       |      |       |      |      |      |      |      |      |      |      |      |       |
|-------------|-----------|---|---|-------|-------|-------|------|-------|------|------|------|------|------|------|------|------|------|-------|
| 9-126462964 | 126462964 | C | T | 0.891 | 0.843 | 0.859 | 0.91 | 0.42  | 1.00 | 0.02 | 0.01 | 0.30 | 0.01 | 0.01 | 0.32 | 0.54 | 0.41 | 0.87  |
| 9-126462986 | 126462986 | C | G | 0.195 | 0.266 | 0.229 | 1.09 | 0.37  | 1.00 | 0.14 | 0.06 | 1.00 | 0.16 | 0.11 | 0.96 | 0.87 | 0.81 | 0.91  |
| 9-126464213 | 126464213 | G | A | 0.891 | 0.845 | 0.859 | 0.91 | 0.42  | 1.00 | 0.02 | 0.01 | 0.30 | 0.01 | 0.01 | 0.32 | 0.54 | 0.41 | 0.87  |
| 9-126464927 | 126464927 | C | G | 0.891 | 0.845 | 0.859 | 0.91 | 0.42  | 1.00 | 0.02 | 0.01 | 0.30 | 0.01 | 0.01 | 0.32 | 0.54 | 0.41 | 0.87  |
| 9-126465322 | 126465322 | G | A | 0.891 | 0.845 | 0.859 | 0.91 | 0.42  | 1.00 | 0.02 | 0.01 | 0.30 | 0.01 | 0.01 | 0.32 | 0.54 | 0.41 | 0.87  |
| 9-126465958 | 126465958 | C | T | 0.855 | 0.781 | 0.809 | 1.03 | 0.79  | 0.99 | 0.02 | 0.02 | 1.00 | 0.02 | 0.02 | 0.96 | 0.55 | 0.65 | 0.08  |
| 9-126466125 | 126466125 | C | T | 0.056 | 0.046 | 0.037 | 1.68 | 0.014 | 1.00 | 0.80 | 0.70 | 0.94 | 0.86 | 1.00 | 0.74 | 0.18 | 0.08 | 0.031 |
| 9-126466145 | 126466145 | C | A | 0.891 | 0.856 | 0.863 | 0.90 | 0.36  | 1.00 | 0.02 | 0.01 | 0.25 | 0.01 | 0.01 | 0.27 | 0.54 | 0.48 | 0.77  |
| 9-126466775 | 126466775 | G | A | 0.891 | 0.845 | 0.859 | 0.91 | 0.42  | 1.00 | 0.02 | 0.01 | 0.30 | 0.01 | 0.01 | 0.32 | 0.54 | 0.41 | 0.87  |
| 9-126467202 | 126467202 | T | C | 0.201 | 0.265 | 0.229 | 1.09 | 0.38  | 1.00 | 0.13 | 0.06 | 0.99 | 0.15 | 0.11 | 0.94 | 0.84 | 0.80 | 0.88  |
| 9-126467309 | 126467309 | T | A | 0.891 | 0.845 | 0.859 | 0.91 | 0.42  | 1.00 | 0.02 | 0.01 | 0.30 | 0.01 | 0.01 | 0.32 | 0.54 | 0.41 | 0.87  |
| 9-126467949 | 126467949 | A | T | 0.891 | 0.845 | 0.859 | 0.91 | 0.42  | 1.00 | 0.02 | 0.01 | 0.30 | 0.01 | 0.01 | 0.32 | 0.54 | 0.41 | 0.87  |
| 9-126468704 | 126468704 | G | A | 0.056 | 0.046 | 0.037 | 1.68 | 0.014 | 1.00 | 0.80 | 0.70 | 0.94 | 0.86 | 1.00 | 0.73 | 0.18 | 0.08 | 0.031 |
| 9-126468735 | 126468735 | G | T | 0.891 | 0.845 | 0.858 | 0.91 | 0.40  | 0.99 | 0.02 | 0.01 | 0.28 | 0.01 | 0.01 | 0.30 | 0.54 | 0.41 | 0.83  |
| 9-126468778 | 126468778 | C | T | 0.891 | 0.845 | 0.859 | 0.91 | 0.42  | 1.00 | 0.02 | 0.01 | 0.30 | 0.01 | 0.01 | 0.32 | 0.54 | 0.41 | 0.87  |
| 9-126469015 | 126469015 | C | A | 0.891 | 0.845 | 0.859 | 0.91 | 0.42  | 1.00 | 0.02 | 0.01 | 0.30 | 0.01 | 0.01 | 0.32 | 0.54 | 0.41 | 0.87  |
| 9-126469730 | 126469730 | A | G | 0.853 | 0.779 | 0.808 | 1.03 | 0.80  | 0.99 | 0.02 | 0.02 | 0.99 | 0.02 | 0.02 | 0.96 | 0.53 | 0.65 | 0.082 |
| 9-126470106 | 126470106 | A | G | 0.888 | 0.843 | 0.859 | 0.91 | 0.43  | 1.00 | 0.02 | 0.01 | 0.31 | 0.02 | 0.01 | 0.33 | 0.52 | 0.41 | 0.88  |
| 9-126471170 | 126471170 | T | C | 0.888 | 0.843 | 0.859 | 0.91 | 0.43  | 1.00 | 0.02 | 0.01 | 0.31 | 0.02 | 0.01 | 0.33 | 0.52 | 0.41 | 0.88  |
| 9-126471188 | 126471188 | T | C | 0.888 | 0.843 | 0.859 | 0.91 | 0.43  | 1.00 | 0.02 | 0.01 | 0.31 | 0.02 | 0.01 | 0.33 | 0.52 | 0.41 | 0.88  |
| 9-126471266 | 126471266 | G | A | 0.888 | 0.843 | 0.859 | 0.91 | 0.43  | 1.00 | 0.02 | 0.01 | 0.31 | 0.02 | 0.01 | 0.33 | 0.52 | 0.41 | 0.88  |
| 9-126471937 | 126471937 | C | T | 0.888 | 0.843 | 0.859 | 0.91 | 0.43  | 1.00 | 0.02 | 0.01 | 0.31 | 0.02 | 0.01 | 0.33 | 0.52 | 0.41 | 0.88  |
| 9-126471970 | 126471970 | T | C | 0.888 | 0.843 | 0.859 | 0.91 | 0.43  | 1.00 | 0.02 | 0.01 | 0.31 | 0.02 | 0.01 | 0.33 | 0.52 | 0.41 | 0.88  |
| 9-126472654 | 126472654 | C | T | 0.888 | 0.843 | 0.859 | 0.91 | 0.43  | 1.00 | 0.02 | 0.01 | 0.31 | 0.02 | 0.01 | 0.33 | 0.52 | 0.41 | 0.88  |
| 9-126472705 | 126472705 | A | G | 0.888 | 0.843 | 0.859 | 0.91 | 0.43  | 1.00 | 0.02 | 0.01 | 0.31 | 0.02 | 0.01 | 0.33 | 0.52 | 0.41 | 0.88  |
| 9-126473108 | 126473108 | C | T | 0.056 | 0.046 | 0.037 | 1.68 | 0.014 | 0.99 | 0.80 | 0.70 | 0.94 | 0.86 | 1.00 | 0.74 | 0.18 | 0.08 | 0.03  |
| 9-126473515 | 126473515 | A | G | 0.058 | 0.046 | 0.037 | 1.68 | 0.015 | 0.99 | 0.84 | 0.70 | 0.93 | 0.82 | 1.00 | 0.71 | 0.19 | 0.08 | 0.03  |
| 9-126476143 | 126476143 | T | C | 0.888 | 0.854 | 0.863 | 0.90 | 0.37  | 1.00 | 0.02 | 0.01 | 0.26 | 0.02 | 0.01 | 0.28 | 0.52 | 0.48 | 0.80  |
| rs7851425   | 126476963 | G | A | 0.076 | 0.091 | 0.086 | 1.25 | 0.15  | 0.84 | 0.63 | 0.28 | 0.79 | 0.50 | 0.45 | 0.67 | 0.35 | 0.22 | 0.31  |
| 9-126477020 | 126477020 | G | A | 0.888 | 0.836 | 0.850 | 0.95 | 0.67  | 1.00 | 0.02 | 0.01 | 0.50 | 0.02 | 0.01 | 0.53 | 0.52 | 0.54 | 0.70  |
| rs4838077   | 126477127 | T | C | 0.888 | 0.836 | 0.848 | 0.94 | 0.56  | 0.97 | 0.02 | 0.01 | 0.40 | 0.02 | 0.01 | 0.43 | 0.52 | 0.54 | 0.87  |
| 9-126477353 | 126477353 | T | C | 0.891 | 0.836 | 0.850 | 0.95 | 0.66  | 1.00 | 0.02 | 0.01 | 0.49 | 0.01 | 0.01 | 0.52 | 0.54 | 0.54 | 0.72  |
| 9-126477441 | 126477441 | T | C | 0.891 | 0.836 | 0.850 | 0.95 | 0.66  | 1.00 | 0.02 | 0.01 | 0.49 | 0.01 | 0.01 | 0.52 | 0.54 | 0.54 | 0.72  |
| 9-126477483 | 126477483 | T | A | 0.053 | 0.046 | 0.037 | 1.68 | 0.015 | 0.98 | 0.92 | 0.70 | 0.94 | 0.73 | 1.00 | 0.73 | 0.22 | 0.08 | 0.032 |
| 9-126478011 | 126478011 | A | G | 0.891 | 0.836 | 0.850 | 0.95 | 0.66  | 1.00 | 0.02 | 0.01 | 0.49 | 0.01 | 0.01 | 0.52 | 0.54 | 0.54 | 0.72  |
| 9-126478093 | 126478093 | T | C | 0.053 | 0.046 | 0.037 | 1.68 | 0.014 | 0.99 | 0.92 | 0.70 | 0.95 | 0.73 | 1.00 | 0.75 | 0.22 | 0.08 | 0.031 |

|                  |                  |          |          |              |              |              |             |             |             |             |             |             |             |             |             |      |      |        |
|------------------|------------------|----------|----------|--------------|--------------|--------------|-------------|-------------|-------------|-------------|-------------|-------------|-------------|-------------|-------------|------|------|--------|
| 9-126478568      | 126478568        | T        | C        | 0.891        | 0.836        | 0.850        | 0.95        | 0.65        | 1.00        | 0.02        | 0.01        | 0.49        | 0.01        | 0.01        | 0.52        | 0.54 | 0.54 | 0.72   |
| 9-126486694      | 126486694        | T        | A        | 0.053        | 0.044        | 0.037        | 1.68        | 0.015       | 0.99        | 0.92        | 0.65        | 0.93        | 0.73        | 0.96        | 0.75        | 0.22 | 0.08 | 0.033  |
| 9-126490113      | 126490113        | C        | T        | 0.193        | 0.250        | 0.224        | 1.09        | 0.39        | 0.99        | 0.19        | 0.05        | 0.97        | 0.12        | 0.08        | 0.98        | 0.94 | 0.90 | 0.81   |
| 9-126490123      | 126490123        | C        | T        | 0.175        | 0.244        | 0.216        | 1.08        | 0.45        | 0.97        | 0.19        | 0.05        | 0.92        | 0.12        | 0.09        | 0.86        | 0.84 | 0.86 | 0.70   |
| 9-126490390      | 126490390        | A        | C        | 0.893        | 0.834        | 0.850        | 0.95        | 0.66        | 1.00        | 0.02        | 0.01        | 0.49        | 0.01        | 0.01        | 0.52        | 0.53 | 0.53 | 0.70   |
| 9-126494022      | 126494022        | C        | T        | 0.195        | 0.254        | 0.227        | 1.09        | 0.36        | 0.99        | 0.16        | 0.06        | 0.97        | 0.12        | 0.10        | 0.99        | 0.90 | 0.90 | 0.92   |
| 9-126497262      | 126497262        | T        | C        | 0.871        | 0.790        | 0.811        | 1.02        | 0.82        | 0.98        | 0.02        | 0.02        | 0.98        | 0.02        | 0.02        | 0.99        | 0.63 | 0.74 | 0.080  |
| 9-126498132      | 126498132        | A        | G        | 0.056        | 0.046        | 0.037        | 1.67        | 0.015       | 0.99        | 0.96        | 0.70        | 0.92        | 0.70        | 1.00        | 0.73        | 0.23 | 0.08 | 0.034  |
| 9-126502000      | 126502000        | G        | A        | 0.185        | 0.259        | 0.228        | 1.10        | 0.34        | 0.98        | 0.20        | 0.07        | 0.95        | 0.14        | 0.10        | 0.99        | 0.98 | 0.89 | 0.96   |
| 9-126502619      | 126502619        | G        | T        | 0.193        | 0.259        | 0.229        | 1.09        | 0.35        | 0.98        | 0.19        | 0.07        | 0.97        | 0.12        | 0.10        | 0.99        | 0.94 | 0.89 | 0.93   |
| 9-126507613      | 126507613        | C        | T        | 0.056        | 0.046        | 0.037        | 1.67        | 0.015       | 0.99        | 0.96        | 0.70        | 0.92        | 0.70        | 1.00        | 0.72        | 0.23 | 0.08 | 0.034  |
| 9-126507918      | 126507918        | C        | T        | 0.056        | 0.046        | 0.037        | 1.67        | 0.015       | 0.99        | 0.96        | 0.70        | 0.91        | 0.70        | 1.00        | 0.71        | 0.23 | 0.08 | 0.035  |
| 9-126509599      | 126509599        | G        | A        | 0.170        | 0.208        | 0.188        | 1.19        | 0.093       | 0.98        | 0.24        | 0.10        | 0.48        | 0.16        | 0.14        | 0.49        | 0.83 | 0.69 | 0.20   |
| 9-126509806      | 126509806        | G        | A        | 0.193        | 0.254        | 0.225        | 1.11        | 0.30        | 0.98        | 0.19        | 0.07        | 0.88        | 0.12        | 0.11        | 0.92        | 0.94 | 0.92 | 0.89   |
| 9-126509996      | 126509996        | T        | C        | 0.193        | 0.254        | 0.225        | 1.10        | 0.30        | 0.99        | 0.19        | 0.07        | 0.89        | 0.12        | 0.11        | 0.93        | 0.94 | 0.92 | 0.91   |
| 9-126515289      | 126515289        | C        | T        | 0.056        | 0.036        | 0.037        | 2.00        | 0.0026      | 0.83        | 0.96        | 1.00        | 0.90        | 0.70        | 0.70        | 0.18        | 0.23 | 0.08 | 0.0069 |
| 9-126517513      | 126517513        | C        | T        | 0.056        | 0.036        | 0.038        | 2.00        | 0.0026      | 0.83        | 0.96        | 1.00        | 0.90        | 0.70        | 0.70        | 0.18        | 0.23 | 0.08 | 0.0069 |
| 9-126518205      | 126518205        | C        | T        | 0.056        | 0.036        | 0.038        | 2.00        | 0.0026      | 0.83        | 0.96        | 1.00        | 0.90        | 0.70        | 0.70        | 0.18        | 0.23 | 0.08 | 0.0069 |
| 9-126518277      | 126518277        | C        | T        | 0.094        | 0.126        | 0.117        | 1.05        | 0.69        | 0.92        | 0.57        | 0.22        | 0.20        | 0.41        | 0.25        | 0.26        | 0.44 | 0.42 | 0.70   |
| 9-126518641      | 126518641        | C        | G        | 0.056        | 0.036        | 0.038        | 1.99        | 0.0027      | 0.83        | 0.96        | 1.00        | 0.92        | 0.70        | 0.70        | 0.18        | 0.23 | 0.08 | 0.0071 |
| 9-126520068      | 126520068        | C        | T        | 0.122        | 0.177        | 0.159        | 0.97        | 0.81        | 0.90        | 0.41        | 0.15        | 0.092       | 0.27        | 0.16        | 0.11        | 0.63 | 0.60 | 0.16   |
| 9-126520497      | 126520497        | A        | G        | 0.058        | 0.036        | 0.038        | 1.99        | 0.0028      | 0.82        | 1.00        | 1.00        | 0.93        | 0.68        | 0.70        | 0.19        | 0.24 | 0.08 | 0.0074 |
| 9-126523296      | 126523296        | T        | C        | 0.122        | 0.177        | 0.159        | 0.97        | 0.81        | 0.90        | 0.41        | 0.15        | 0.09        | 0.27        | 0.16        | 0.11        | 0.63 | 0.60 | 0.16   |
| 9-126523299      | 126523299        | C        | T        | 0.058        | 0.036        | 0.038        | 2.00        | 0.0026      | 0.82        | 1.00        | 1.00        | 0.91        | 0.68        | 0.70        | 0.18        | 0.24 | 0.08 | 0.0070 |
| 9-126523405      | 126523405        | C        | T        | 0.107        | 0.122        | 0.106        | 1.08        | 0.57        | 0.90        | 0.45        | 0.24        | 0.22        | 0.29        | 0.27        | 0.26        | 0.53 | 0.36 | 0.95   |
| <b>rs2479106</b> | <b>126525212</b> | <b>G</b> | <b>A</b> | <b>0.188</b> | <b>0.256</b> | <b>0.228</b> | <b>1.10</b> | <b>0.35</b> | <b>0.97</b> | <b>0.24</b> | <b>0.08</b> | <b>0.96</b> | <b>0.15</b> | <b>0.08</b> | <b>0.85</b> | -    | -    | -      |
| 9-126527679      | 126527679        | C        | T        | 0.058        | 0.036        | 0.035        | 1.87        | 0.0047      | 0.97        | 1.00        | 1.00        | 1.00        | 0.68        | 0.70        | 0.19        | 0.24 | 0.08 | 0.0098 |
| 9-126529097      | 126529097        | C        | G        | 0.096        | 0.128        | 0.114        | 1.10        | 0.44        | 0.99        | 0.62        | 0.22        | 0.40        | 0.42        | 0.25        | 0.61        | 0.45 | 0.42 | 0.84   |
| 9-126530988      | 126530988        | C        | A        | 0.122        | 0.157        | 0.131        | 1.09        | 0.48        | 1.00        | 0.41        | 0.18        | 0.44        | 0.27        | 0.19        | 0.59        | 0.63 | 0.54 | 0.95   |
| 9-126531755      | 126531755        | C        | T        | 0.122        | 0.177        | 0.150        | 1.04        | 0.73        | 0.99        | 0.41        | 0.15        | 0.29        | 0.27        | 0.16        | 0.41        | 0.63 | 0.60 | 0.59   |
| rs1752156        | 126534512        | C        | T        | 0.122        | 0.170        | 0.146        | 1.07        | 0.58        | 0.91        | 0.41        | 0.16        | 0.34        | 0.27        | 0.17        | 0.56        | 0.63 | 0.49 | 0.91   |
| 9-126535553      | 126535553        | C        | T        | 0.084        | 0.066        | 0.052        | 1.53        | 0.021       | 0.97        | 0.62        | 0.55        | 0.98        | 0.41        | 0.37        | 0.38        | 0.44 | 0.18 | 0.040  |
| 9-126535642      | 126535642        | C        | T        | 0.086        | 0.066        | 0.052        | 1.53        | 0.021       | 0.97        | 0.60        | 0.55        | 0.98        | 0.40        | 0.37        | 0.38        | 0.45 | 0.18 | 0.041  |
| 9-126535864      | 126535864        | C        | T        | 0.058        | 0.036        | 0.034        | 1.88        | 0.0046      | 0.97        | 1.00        | 1.00        | 0.99        | 0.68        | 0.70        | 0.18        | 0.24 | 0.08 | 0.010  |
| 9-126537683      | 126537683        | A        | G        | 0.058        | 0.036        | 0.039        | 1.72        | 0.011       | 0.94        | 1.00        | 1.00        | 0.54        | 0.68        | 0.70        | 0.33        | 0.24 | 0.08 | 0.023  |
| 9-126537952      | 126537952        | C        | T        | 0.081        | 0.095        | 0.079        | 1.18        | 0.26        | 0.98        | 0.72        | 0.31        | 0.35        | 0.48        | 0.35        | 0.73        | 0.37 | 0.24 | 0.49   |

|                   |                  |          |          |              |              |              |             |               |             |          |          |          |             |             |             |             |             |               |
|-------------------|------------------|----------|----------|--------------|--------------|--------------|-------------|---------------|-------------|----------|----------|----------|-------------|-------------|-------------|-------------|-------------|---------------|
| 9-126539944       | 126539944        | G        | A        | 0.089        | 0.066        | 0.052        | 1.52        | 0.021         | 0.98        | 0.59     | 0.55     | 0.98     | 0.39        | 0.37        | 0.38        | 0.46        | 0.18        | 0.041         |
| 9-126540566       | 126540566        | A        | G        | 0.124        | 0.179        | 0.148        | 1.03        | 0.82          | 0.98        | 0.4      | 0.15     | 0.22     | 0.27        | 0.16        | 0.38        | 0.64        | 0.59        | 0.46          |
| 9-126540800       | 126540800        | C        | G        | 0.025        | 0.000        | 0.002        | 1.45        | 0.78          | 0.10        | 0.51     | 1.00     | 0.50     | 0.32        | 1.00        | 0.58        | 0.14        | 1.00        | 0.95          |
| 9-126542635       | 126542635        | T        | C        | 0.058        | 0.036        | 0.034        | 1.88        | 0.0043        | 0.99        | 1.00     | 1.00     | 0.96     | 0.68        | 0.70        | 0.17        | 0.24        | 0.08        | 0.0089        |
| 9-126542704       | 126542704        | T        | A        | 0.188        | 0.257        | 0.229        | 1.08        | 0.45          | 0.99        | 0.24     | 0.08     | 0.79     | 0.15        | 0.08        | 1.00        | 1.00        | 0.99        | 0.57          |
| rs2799465         | 126544609        | C        | T        | 0.109        | 0.124        | 0.098        | 1.15        | 0.3           | 0.98        | 0.44     | 0.23     | 0.46     | 0.28        | 0.26        | 0.71        | 0.54        | 0.35        | 0.56          |
| 9-126546255       | 126546255        | G        | A        | 0.058        | 0.036        | 0.034        | 1.87        | 0.0044        | 1.00        | 1.00     | 1.00     | 1.00     | 0.68        | 0.70        | 0.17        | 0.24        | 0.08        | 0.0091        |
| 9-126548266       | 126548266        | T        | A        | 0.058        | 0.036        | 0.035        | 1.86        | 0.0046        | 1.00        | 1.00     | 1.00     | 0.55     | 0.68        | 0.7         | 0.17        | 0.24        | 0.08        | 0.0095        |
| 9-126548335       | 126548335        | T        | C        | 0.086        | 0.066        | 0.051        | 1.51        | 0.023         | 1.00        | 0.60     | 0.55     | 0.92     | 0.40        | 0.37        | 0.38        | 0.45        | 0.18        | 0.046         |
| 9-126549420       | 126549420        | G        | T        | 0.188        | 0.257        | 0.229        | 1.07        | 0.46          | 0.99        | 0.24     | 0.08     | 0.78     | 0.15        | 0.08        | 0.99        | 1.00        | 0.99        | 0.51          |
| 9-126549526       | 126549526        | C        | T        | 0.058        | 0.036        | 0.035        | 1.86        | 0.0046        | 1.00        | 1.00     | 1.00     | 0.56     | 0.68        | 0.70        | 0.17        | 0.24        | 0.08        | 0.010         |
| <b>rs10986105</b> | <b>126549955</b> | <b>C</b> | <b>A</b> | <b>0.058</b> | <b>0.036</b> | <b>0.034</b> | <b>1.87</b> | <b>0.0044</b> | <b>1.00</b> | <b>-</b> | <b>-</b> | <b>-</b> | <b>0.68</b> | <b>0.70</b> | <b>0.17</b> | <b>0.24</b> | <b>0.08</b> | <b>0.0091</b> |
| 9-126550605       | 126550605        | A        | G        | 0.124        | 0.179        | 0.147        | 1.02        | 0.86          | 0.99        | 0.40     | 0.15     | 0.19     | 0.27        | 0.16        | 0.37        | 0.64        | 0.59        | 0.41          |
| 9-126551018       | 126551018        | A        | G        | 0.058        | 0.036        | 0.034        | 1.87        | 0.0044        | 1.00        | 1.00     | 1.00     | 1.00     | 0.68        | 0.70        | 0.17        | 0.24        | 0.08        | 0.0091        |
| 9-126551392       | 126551392        | G        | A        | 0.058        | 0.036        | 0.035        | 1.86        | 0.0046        | 1.00        | 1.00     | 1.00     | 0.56     | 0.68        | 0.70        | 0.17        | 0.24        | 0.08        | 0.010         |
| 9-126551776       | 126551776        | C        | T        | 0.058        | 0.036        | 0.034        | 1.87        | 0.0044        | 1.00        | 1.00     | 1.00     | 1.00     | 0.68        | 0.70        | 0.17        | 0.24        | 0.08        | 0.0091        |
| 9-126555072       | 126555072        | C        | G        | 0.086        | 0.066        | 0.052        | 1.49        | 0.026         | 1.00        | 0.60     | 0.55     | 0.88     | 0.40        | 0.37        | 0.40        | 0.45        | 0.18        | 0.050         |
| 9-126558417       | 126558417        | C        | T        | 0.038        | 0.038        | 0.034        | 1.86        | 0.0045        | 1.00        | 0.68     | 0.95     | 0.83     | 0.55        | 0.66        | 0.17        | 0.18        | 0.08        | 0.0093        |
| 9-126558537       | 126558537        | C        | T        | 0.107        | 0.135        | 0.101        | 1.16        | 0.27          | 1.00        | 0.17     | 0.22     | 0.53     | 0.14        | 0.22        | 0.90        | 0.54        | 0.41        | 0.52          |
| 9-126558810       | 126558810        | C        | T        | 0.107        | 0.155        | 0.120        | 1.08        | 0.51          | 1.00        | 0.17     | 0.18     | 0.33     | 0.14        | 0.18        | 0.62        | 0.54        | 0.47        | 0.98          |
| rs1752166         | 126558843        | G        | T        | 0.107        | 0.155        | 0.120        | 1.10        | 0.45          | 1.00        | 0.17     | 0.18     | 0.39     | 0.14        | 0.18        | 0.70        | 0.54        | 0.47        | 0.88          |
| 9-126558857       | 126558857        | A        | G        | 0.038        | 0.038        | 0.034        | 1.86        | 0.0045        | 1.00        | 0.68     | 0.95     | 0.84     | 0.55        | 0.66        | 0.17        | 0.18        | 0.08        | 0.0093        |
| 9-126563493       | 126563493        | C        | T        | 0.038        | 0.038        | 0.035        | 1.86        | 0.0046        | 1.00        | 0.68     | 0.95     | 0.78     | 0.55        | 0.66        | 0.17        | 0.18        | 0.08        | 0.0096        |
| 9-126566945       | 126566945        | G        | A        | 0.038        | 0.038        | 0.034        | 1.86        | 0.0045        | 1.00        | 0.68     | 0.95     | 0.84     | 0.55        | 0.66        | 0.17        | 0.18        | 0.08        | 0.0093        |
| 9-126569115       | 126569115        | C        | A        | 0.038        | 0.038        | 0.034        | 1.86        | 0.0045        | 1.00        | 0.68     | 0.95     | 0.84     | 0.55        | 0.66        | 0.17        | 0.18        | 0.08        | 0.0093        |
| 9-126569652       | 126569652        | G        | C        | 0.038        | 0.038        | 0.034        | 1.87        | 0.0043        | 1.00        | 0.68     | 0.95     | 0.90     | 0.55        | 0.66        | 0.16        | 0.18        | 0.08        | 0.0089        |
| 9-126569931       | 126569931        | C        | T        | 0.038        | 0.038        | 0.034        | 1.87        | 0.0043        | 1.00        | 0.68     | 0.95     | 0.90     | 0.55        | 0.66        | 0.16        | 0.18        | 0.08        | 0.0089        |
| 9-126570553       | 126570553        | G        | T        | 0.038        | 0.038        | 0.034        | 1.86        | 0.0045        | 1.00        | 0.68     | 0.95     | 0.84     | 0.55        | 0.66        | 0.17        | 0.18        | 0.08        | 0.0093        |
| 9-126572807       | 126572807        | G        | A        | 0.038        | 0.036        | 0.034        | 1.86        | 0.0045        | 1.00        | 0.68     | 0.90     | 0.90     | 0.55        | 0.62        | 0.17        | 0.18        | 0.08        | 0.0093        |
| 9-126574725       | 126574725        | A        | T        | 0.038        | 0.036        | 0.034        | 1.86        | 0.0045        | 1.00        | 0.68     | 0.90     | 0.90     | 0.55        | 0.62        | 0.17        | 0.18        | 0.08        | 0.0093        |
| 9-126582007       | 126582007        | G        | C        | 0.104        | 0.131        | 0.100        | 1.17        | 0.25          | 1.00        | 0.19     | 0.19     | 0.55     | 0.15        | 0.19        | 0.94        | 0.52        | 0.35        | 0.47          |
| 9-126584407       | 126584407        | G        | A        | 0.104        | 0.131        | 0.100        | 1.17        | 0.25          | 1.00        | 0.19     | 0.19     | 0.55     | 0.15        | 0.19        | 0.94        | 0.52        | 0.35        | 0.47          |
| 9-126586563       | 126586563        | A        | C        | 0.170        | 0.235        | 0.203        | 1.10        | 0.34          | 1.00        | 0.09     | 0.07     | 0.90     | 0.06        | 0.08        | 0.86        | 0.84        | 0.80        | 0.81          |
| 9-126590276       | 126590276        | C        | G        | 0.104        | 0.131        | 0.100        | 1.17        | 0.25          | 1.00        | 0.19     | 0.19     | 0.55     | 0.15        | 0.19        | 0.94        | 0.52        | 0.35        | 0.47          |
| 9-126590687       | 126590687        | T        | C        | 0.104        | 0.131        | 0.100        | 1.17        | 0.25          | 1.00        | 0.19     | 0.19     | 0.55     | 0.15        | 0.19        | 0.94        | 0.52        | 0.35        | 0.47          |
| 9-126593070       | 126593070        | A        | G        | 0.038        | 0.036        | 0.034        | 1.86        | 0.0045        | 1.00        | 0.68     | 0.90     | 0.84     | 0.55        | 0.62        | 0.17        | 0.18        | 0.08        | 0.0093        |



|             |           |   |   |       |       |       |      |        |      |      |      |      |      |      |      |      |      |        |
|-------------|-----------|---|---|-------|-------|-------|------|--------|------|------|------|------|------|------|------|------|------|--------|
| 9-126593370 | 126593370 | G | A | 0.170 | 0.235 | 0.203 | 1.10 | 0.34   | 1.00 | 0.09 | 0.07 | 0.90 | 0.06 | 0.08 | 0.85 | 0.84 | 0.80 | 0.80   |
| 9-126595628 | 126595628 | G | A | 0.038 | 0.036 | 0.034 | 1.86 | 0.0045 | 1.00 | 0.68 | 0.90 | 0.84 | 0.55 | 0.62 | 0.17 | 0.18 | 0.08 | 0.0093 |
| 9-126596271 | 126596271 | A | G | 0.038 | 0.036 | 0.034 | 1.86 | 0.0045 | 1.00 | 0.68 | 0.90 | 0.84 | 0.55 | 0.62 | 0.17 | 0.18 | 0.08 | 0.0093 |
| 9-126596547 | 126596547 | G | A | 0.104 | 0.133 | 0.100 | 1.17 | 0.25   | 0.99 | 0.19 | 0.19 | 0.55 | 0.15 | 0.19 | 0.94 | 0.52 | 0.34 | 0.48   |
| 9-126598352 | 126598352 | A | G | 0.038 | 0.036 | 0.034 | 1.87 | 0.0043 | 1.00 | 0.68 | 0.90 | 0.90 | 0.55 | 0.62 | 0.16 | 0.18 | 0.08 | 0.0089 |
| 9-126598435 | 126598435 | C | T | 0.170 | 0.235 | 0.203 | 1.10 | 0.34   | 1.00 | 0.09 | 0.07 | 0.90 | 0.06 | 0.08 | 0.85 | 0.84 | 0.80 | 0.80   |
| 9-126599595 | 126599595 | T | C | 0.038 | 0.036 | 0.034 | 1.86 | 0.0045 | 1.00 | 0.68 | 0.90 | 0.84 | 0.55 | 0.62 | 0.17 | 0.18 | 0.08 | 0.0093 |
| 9-126602627 | 126602627 | C | T | 0.038 | 0.036 | 0.034 | 1.87 | 0.0043 | 1.00 | 0.68 | 0.90 | 0.90 | 0.55 | 0.62 | 0.16 | 0.18 | 0.08 | 0.0089 |
| 9-126603775 | 126603775 | C | A | 0.038 | 0.036 | 0.034 | 1.87 | 0.0043 | 1.00 | 0.68 | 0.90 | 0.90 | 0.55 | 0.62 | 0.16 | 0.18 | 0.08 | 0.0089 |
| 9-126606892 | 126606892 | G | C | 0.104 | 0.131 | 0.100 | 1.17 | 0.25   | 1.00 | 0.19 | 0.19 | 0.55 | 0.15 | 0.19 | 0.94 | 0.52 | 0.35 | 0.47   |
| 9-126608922 | 126608922 | C | A | 0.038 | 0.036 | 0.034 | 1.87 | 0.0043 | 1.00 | 0.68 | 0.90 | 0.90 | 0.55 | 0.62 | 0.16 | 0.18 | 0.08 | 0.0089 |
| 9-126609097 | 126609097 | G | T | 0.038 | 0.036 | 0.034 | 1.86 | 0.0045 | 1.00 | 0.68 | 0.90 | 0.84 | 0.55 | 0.62 | 0.17 | 0.18 | 0.08 | 0.0093 |
| 9-126610144 | 126610144 | T | C | 0.038 | 0.036 | 0.034 | 1.87 | 0.0043 | 1.00 | 0.68 | 0.90 | 0.89 | 0.55 | 0.62 | 0.16 | 0.18 | 0.08 | 0.0089 |
| 9-126610982 | 126610982 | A | C | 0.104 | 0.131 | 0.100 | 1.17 | 0.25   | 1.00 | 0.19 | 0.19 | 0.56 | 0.15 | 0.19 | 0.94 | 0.52 | 0.35 | 0.47   |
| 9-126612949 | 126612949 | T | C | 0.038 | 0.036 | 0.034 | 1.90 | 0.0038 | 0.99 | 0.68 | 0.90 | 0.67 | 0.55 | 0.62 | 0.15 | 0.18 | 0.08 | 0.0080 |
| 9-126615488 | 126615488 | T | C | 0.038 | 0.036 | 0.034 | 1.92 | 0.0034 | 0.99 | 0.68 | 0.90 | 0.55 | 0.55 | 0.62 | 0.13 | 0.18 | 0.08 | 0.0071 |
| 9-126618337 | 126618337 | G | A | 0.038 | 0.036 | 0.033 | 1.94 | 0.0031 | 0.99 | 0.68 | 0.90 | 0.50 | 0.55 | 0.62 | 0.13 | 0.18 | 0.08 | 0.0066 |
| 9-126618581 | 126618581 | G | A | 0.104 | 0.131 | 0.099 | 1.18 | 0.23   | 0.99 | 0.19 | 0.19 | 0.63 | 0.15 | 0.19 | 0.98 | 0.52 | 0.35 | 0.44   |
| 9-126620552 | 126620552 | G | A | 0.104 | 0.133 | 0.099 | 1.18 | 0.23   | 0.99 | 0.19 | 0.18 | 0.65 | 0.15 | 0.18 | 0.97 | 0.52 | 0.36 | 0.43   |
| 9-126621015 | 126621015 | A | G | 0.038 | 0.036 | 0.033 | 1.94 | 0.003  | 0.99 | 0.68 | 0.90 | 0.49 | 0.55 | 0.62 | 0.12 | 0.18 | 0.08 | 0.0064 |
| 9-126623024 | 126623024 | T | C | 0.104 | 0.131 | 0.099 | 1.18 | 0.23   | 0.99 | 0.19 | 0.19 | 0.65 | 0.15 | 0.19 | 0.97 | 0.52 | 0.35 | 0.44   |
| 9-126623375 | 126623375 | C | G | 0.038 | 0.036 | 0.033 | 1.95 | 0.003  | 0.99 | 0.68 | 0.90 | 0.48 | 0.55 | 0.62 | 0.12 | 0.18 | 0.08 | 0.0063 |
| 9-126625509 | 126625509 | C | T | 0.104 | 0.131 | 0.099 | 1.18 | 0.23   | 0.99 | 0.19 | 0.19 | 0.66 | 0.15 | 0.19 | 0.96 | 0.52 | 0.35 | 0.43   |
| 9-126625888 | 126625888 | C | A | 0.038 | 0.036 | 0.033 | 1.95 | 0.0029 | 1.00 | 0.68 | 0.90 | 0.47 | 0.55 | 0.62 | 0.12 | 0.18 | 0.08 | 0.0062 |
| 9-126628673 | 126628673 | A | G | 0.038 | 0.036 | 0.033 | 1.95 | 0.0029 | 1.00 | 0.68 | 0.90 | 0.46 | 0.55 | 0.62 | 0.12 | 0.18 | 0.08 | 0.0061 |
| 9-126633099 | 126633099 | T | C | 0.038 | 0.036 | 0.033 | 1.96 | 0.0028 | 1.00 | 0.68 | 0.90 | 0.45 | 0.55 | 0.62 | 0.11 | 0.18 | 0.08 | 0.0059 |
| rs2670139   | 126634255 | C | T | 0.168 | 0.223 | 0.201 | 1.13 | 0.21   | 0.98 | 0.09 | 0.08 | 0.81 | 0.06 | 0.07 | 0.59 | 0.82 | 0.74 | 0.39   |
| 9-126634414 | 126634414 | A | C | 0.102 | 0.131 | 0.103 | 1.17 | 0.24   | 1.00 | 0.20 | 0.19 | 0.69 | 0.16 | 0.19 | 0.95 | 0.51 | 0.35 | 0.45   |
| 9-126636855 | 126636855 | G | A | 0.038 | 0.036 | 0.033 | 1.96 | 0.0028 | 1.00 | 0.68 | 0.90 | 0.45 | 0.55 | 0.62 | 0.11 | 0.18 | 0.08 | 0.0059 |
| 9-126638336 | 126638336 | C | T | 0.038 | 0.036 | 0.033 | 1.96 | 0.0028 | 1.00 | 0.68 | 0.90 | 0.45 | 0.55 | 0.62 | 0.11 | 0.18 | 0.08 | 0.0059 |
| 9-126641091 | 126641091 | G | A | 0.102 | 0.131 | 0.103 | 1.17 | 0.24   | 1.00 | 0.20 | 0.19 | 0.69 | 0.16 | 0.19 | 0.95 | 0.51 | 0.35 | 0.45   |
| 9-126646519 | 126646519 | G | A | 0.168 | 0.223 | 0.195 | 1.15 | 0.18   | 1.00 | 0.09 | 0.08 | 0.73 | 0.06 | 0.07 | 0.52 | 0.82 | 0.74 | 0.30   |
| 9-126647256 | 126647256 | G | C | 0.033 | 0.036 | 0.024 | 2.68 | 0.001  | 0.74 | 0.61 | 0.90 | 0.33 | 0.46 | 0.62 | 0.08 | 0.16 | 0.08 | 0.0025 |
| 9-126647380 | 126647380 | C | T | 0.102 | 0.133 | 0.105 | 1.14 | 0.31   | 1.00 | 0.20 | 0.19 | 0.57 | 0.16 | 0.19 | 0.92 | 0.51 | 0.34 | 0.56   |
| 9-126648704 | 126648704 | T | A | 0.038 | 0.036 | 0.033 | 1.96 | 0.0028 | 1.00 | 0.68 | 0.90 | 0.45 | 0.55 | 0.62 | 0.11 | 0.18 | 0.08 | 0.0059 |
| 9-126650180 | 126650180 | A | C | 0.102 | 0.131 | 0.103 | 1.17 | 0.24   | 1.00 | 0.20 | 0.19 | 0.69 | 0.16 | 0.19 | 0.95 | 0.51 | 0.35 | 0.45   |

|             |           |   |   |       |       |       |      |        |      |      |      |      |      |      |       |      |      |        |
|-------------|-----------|---|---|-------|-------|-------|------|--------|------|------|------|------|------|------|-------|------|------|--------|
| rs2041545   | 126650515 | T | C | 0.102 | 0.131 | 0.103 | 1.16 | 0.25   | 0.99 | 0.20 | 0.19 | 0.68 | 0.16 | 0.19 | 0.97  | 0.51 | 0.35 | 0.47   |
| 9-126654091 | 126654091 | T | C | 0.038 | 0.036 | 0.033 | 1.96 | 0.0028 | 1.00 | 0.68 | 0.90 | 0.45 | 0.55 | 0.62 | 0.11  | 0.18 | 0.08 | 0.0059 |
| 9-126655730 | 126655730 | G | A | 0.038 | 0.036 | 0.033 | 1.96 | 0.0028 | 1.00 | 0.68 | 0.90 | 0.45 | 0.55 | 0.62 | 0.11  | 0.18 | 0.08 | 0.0059 |
| 9-126655990 | 126655990 | C | G | 0.038 | 0.036 | 0.033 | 1.96 | 0.0028 | 1.00 | 0.68 | 0.90 | 0.45 | 0.55 | 0.62 | 0.11  | 0.18 | 0.08 | 0.0059 |
| 9-126656997 | 126656997 | T | C | 0.102 | 0.131 | 0.103 | 1.17 | 0.24   | 1.00 | 0.20 | 0.19 | 0.69 | 0.16 | 0.19 | 0.95  | 0.51 | 0.35 | 0.45   |
| 9-126657884 | 126657884 | C | G | 0.038 | 0.036 | 0.033 | 1.96 | 0.0028 | 1.00 | 0.68 | 0.90 | 0.45 | 0.55 | 0.62 | 0.11  | 0.18 | 0.08 | 0.0059 |
| 9-126661757 | 126661757 | G | A | 0.038 | 0.036 | 0.032 | 1.96 | 0.0028 | 0.99 | 0.68 | 0.90 | 0.45 | 0.55 | 0.62 | 0.11  | 0.18 | 0.08 | 0.0059 |
| 9-126661962 | 126661962 | T | C | 0.035 | 0.036 | 0.024 | 2.66 | 0.0011 | 0.75 | 0.65 | 0.90 | 0.35 | 0.50 | 0.62 | 0.08  | 0.17 | 0.08 | 0.0026 |
| 9-126661968 | 126661968 | C | T | 0.028 | 0.002 | 0.003 | 0.58 | 0.71   | 0.28 | 0.54 | 0.05 | 0.25 | 0.36 | 0.04 | 0.35  | 0.15 | 0.02 | 0.62   |
| 9-126662879 | 126662879 | G | C | 0.102 | 0.131 | 0.103 | 1.17 | 0.24   | 1.00 | 0.20 | 0.19 | 0.69 | 0.16 | 0.19 | 0.95  | 0.51 | 0.35 | 0.45   |
| 9-126662924 | 126662924 | C | G | 0.102 | 0.131 | 0.103 | 1.17 | 0.24   | 1.00 | 0.20 | 0.19 | 0.69 | 0.16 | 0.19 | 0.95  | 0.51 | 0.35 | 0.45   |
| 9-126663019 | 126663019 | C | A | 0.102 | 0.131 | 0.103 | 1.16 | 0.25   | 0.99 | 0.20 | 0.19 | 0.68 | 0.16 | 0.19 | 0.97  | 0.51 | 0.35 | 0.47   |
| 9-126665439 | 126665439 | G | A | 0.048 | 0.079 | 0.055 | 1.44 | 0.048  | 0.92 | 0.53 | 0.38 | 0.73 | 0.42 | 0.36 | 0.61  | 0.23 | 0.21 | 0.090  |
| 9-126666057 | 126666057 | A | G | 0.038 | 0.031 | 0.031 | 1.87 | 0.0079 | 0.96 | 0.68 | 0.84 | 0.79 | 0.55 | 0.58 | 0.25  | 0.18 | 0.07 | 0.016  |
| 9-126666959 | 126666959 | A | G | 0.038 | 0.036 | 0.032 | 1.97 | 0.0028 | 0.99 | 0.68 | 0.90 | 0.46 | 0.55 | 0.62 | 0.11  | 0.18 | 0.08 | 0.0059 |
| 9-126671823 | 126671823 | T | C | 0.038 | 0.036 | 0.032 | 1.98 | 0.0028 | 0.98 | 0.68 | 0.90 | 0.48 | 0.55 | 0.62 | 0.12  | 0.18 | 0.08 | 0.0060 |
| 9-126674209 | 126674209 | G | A | 0.102 | 0.131 | 0.101 | 1.17 | 0.25   | 0.97 | 0.20 | 0.19 | 0.70 | 0.16 | 0.19 | 0.97  | 0.51 | 0.35 | 0.47   |
| 9-126676996 | 126676996 | C | G | 0.038 | 0.036 | 0.032 | 1.98 | 0.0029 | 0.98 | 0.68 | 0.90 | 0.50 | 0.55 | 0.62 | 0.12  | 0.18 | 0.08 | 0.0061 |
| 9-126677253 | 126677253 | T | A | 0.038 | 0.036 | 0.032 | 1.98 | 0.0029 | 0.98 | 0.68 | 0.90 | 0.50 | 0.55 | 0.62 | 0.12  | 0.18 | 0.08 | 0.0061 |
| 9-126678431 | 126678431 | C | T | 0.038 | 0.036 | 0.032 | 1.98 | 0.0029 | 0.98 | 0.68 | 0.90 | 0.51 | 0.55 | 0.62 | 0.12  | 0.18 | 0.08 | 0.0062 |
| 9-126679734 | 126679734 | C | T | 0.038 | 0.036 | 0.032 | 1.98 | 0.0029 | 0.97 | 0.68 | 0.90 | 0.52 | 0.55 | 0.62 | 0.12  | 0.18 | 0.08 | 0.0063 |
| 9-126680268 | 126680268 | T | C | 0.038 | 0.036 | 0.032 | 1.98 | 0.0029 | 0.97 | 0.68 | 0.90 | 0.53 | 0.55 | 0.62 | 0.12  | 0.18 | 0.08 | 0.0063 |
| 9-126680970 | 126680970 | G | A | 0.038 | 0.036 | 0.032 | 1.98 | 0.003  | 0.97 | 0.68 | 0.90 | 0.54 | 0.55 | 0.62 | 0.12  | 0.18 | 0.08 | 0.0064 |
| 9-126683955 | 126683955 | C | T | 0.162 | 0.241 | 0.212 | 1.10 | 0.33   | 1.00 | 0.09 | 0.07 | 0.99 | 0.07 | 0.07 | 0.78  | 0.79 | 0.77 | 0.77   |
| 9-126684780 | 126684780 | A | G | 0.038 | 0.036 | 0.032 | 1.98 | 0.0032 | 0.97 | 0.68 | 0.90 | 0.59 | 0.55 | 0.62 | 0.13  | 0.18 | 0.08 | 0.0068 |
| 9-126689101 | 126689101 | G | A | 0.038 | 0.035 | 0.031 | 1.96 | 0.0038 | 0.99 | 0.68 | 0.84 | 0.66 | 0.55 | 0.58 | 0.15  | 0.18 | 0.08 | 0.0080 |
| 9-126689150 | 126689150 | G | C | 0.147 | 0.203 | 0.186 | 1.11 | 0.31   | 0.99 | 0.10 | 0.08 | 0.96 | 0.07 | 0.09 | 0.80  | 0.71 | 0.63 | 0.67   |
| 9-126689437 | 126689437 | C | T | 0.038 | 0.035 | 0.031 | 1.95 | 0.0039 | 0.99 | 0.68 | 0.84 | 0.68 | 0.55 | 0.58 | 0.15  | 0.18 | 0.08 | 0.0082 |
| 9-126689557 | 126689557 | C | T | 0.162 | 0.223 | 0.202 | 1.09 | 0.39   | 1.00 | 0.09 | 0.07 | 0.88 | 0.07 | 0.07 | 0.88  | 0.79 | 0.73 | 0.89   |
| 9-126691221 | 126691221 | G | A | 0.038 | 0.035 | 0.031 | 1.95 | 0.004  | 0.99 | 0.68 | 0.84 | 0.68 | 0.55 | 0.58 | 0.15  | 0.18 | 0.08 | 0.0084 |
| 9-126691898 | 126691898 | A | G | 0.038 | 0.027 | 0.027 | 1.81 | 0.024  | 0.88 | 0.68 | 0.63 | 0.40 | 0.55 | 0.50 | 0.57  | 0.18 | 0.06 | 0.047  |
| 9-126692599 | 126692599 | T | G | 0.122 | 0.177 | 0.167 | 1.14 | 0.24   | 0.99 | 0.16 | 0.09 | 0.95 | 0.12 | 0.10 | 0.68  | 0.56 | 0.51 | 0.48   |
| 9-126692600 | 126692600 | G | T | 0.122 | 0.175 | 0.163 | 1.12 | 0.3    | 0.98 | 0.16 | 0.08 | 0.96 | 0.12 | 0.09 | 0.71  | 0.56 | 0.49 | 0.61   |
| 9-126692760 | 126692760 | G | A | 0.038 | 0.135 | 0.103 | 1.58 | 0.0024 | 0.77 | 0.68 | 0.21 | 0.09 | 0.55 | 0.15 | 0.031 | 0.18 | 0.00 | 0.0030 |
| 9-126693626 | 126693626 | T | C | 0.038 | 0.035 | 0.031 | 1.95 | 0.004  | 0.99 | 0.68 | 0.84 | 0.68 | 0.55 | 0.58 | 0.15  | 0.18 | 0.08 | 0.0084 |
| 9-126693752 | 126693752 | T | G | 0.038 | 0.035 | 0.031 | 1.95 | 0.004  | 0.99 | 0.68 | 0.84 | 0.68 | 0.55 | 0.58 | 0.15  | 0.18 | 0.08 | 0.0084 |

|             |           |   |   |       |       |       |      |        |      |      |      |      |      |      |      |      |      |        |
|-------------|-----------|---|---|-------|-------|-------|------|--------|------|------|------|------|------|------|------|------|------|--------|
| 9-126693793 | 126693793 | T | G | 0.038 | 0.035 | 0.031 | 1.95 | 0.004  | 0.99 | 0.68 | 0.84 | 0.68 | 0.55 | 0.58 | 0.15 | 0.18 | 0.08 | 0.0084 |
| 9-126693826 | 126693826 | A | G | 0.038 | 0.035 | 0.031 | 1.95 | 0.004  | 0.99 | 0.68 | 0.84 | 0.68 | 0.55 | 0.58 | 0.15 | 0.18 | 0.08 | 0.0084 |
| 9-126694094 | 126694094 | A | T | 0.147 | 0.235 | 0.214 | 1.08 | 0.41   | 0.99 | 0.13 | 0.06 | 0.89 | 0.09 | 0.07 | 0.89 | 0.74 | 0.76 | 0.98   |
| 9-126694495 | 126694495 | G | C | 0.038 | 0.035 | 0.031 | 1.95 | 0.004  | 0.99 | 0.68 | 0.84 | 0.67 | 0.55 | 0.58 | 0.15 | 0.18 | 0.08 | 0.0084 |
| 9-126695770 | 126695770 | A | G | 0.122 | 0.166 | 0.155 | 1.19 | 0.11   | 0.99 | 0.16 | 0.10 | 0.64 | 0.12 | 0.12 | 0.41 | 0.56 | 0.46 | 0.20   |
| 9-126695851 | 126695851 | A | G | 0.038 | 0.035 | 0.031 | 1.95 | 0.004  | 0.99 | 0.68 | 0.84 | 0.67 | 0.55 | 0.58 | 0.15 | 0.18 | 0.08 | 0.0084 |
| 9-126695992 | 126695992 | A | C | 0.038 | 0.035 | 0.031 | 1.95 | 0.004  | 0.99 | 0.68 | 0.84 | 0.67 | 0.55 | 0.58 | 0.15 | 0.18 | 0.08 | 0.0084 |
| 9-126697277 | 126697277 | C | G | 0.038 | 0.035 | 0.031 | 1.95 | 0.004  | 0.99 | 0.68 | 0.84 | 0.67 | 0.55 | 0.58 | 0.15 | 0.18 | 0.08 | 0.0084 |
| 9-126697865 | 126697865 | T | C | 0.147 | 0.235 | 0.215 | 1.08 | 0.45   | 0.99 | 0.13 | 0.06 | 0.84 | 0.09 | 0.08 | 0.94 | 0.74 | 0.76 | 0.90   |
| 9-126698268 | 126698268 | G | A | 0.038 | 0.035 | 0.031 | 1.95 | 0.004  | 0.99 | 0.68 | 0.84 | 0.67 | 0.55 | 0.58 | 0.15 | 0.18 | 0.08 | 0.0084 |
| 9-126701651 | 126701651 | A | G | 0.147 | 0.235 | 0.215 | 1.08 | 0.44   | 0.98 | 0.13 | 0.06 | 0.85 | 0.09 | 0.08 | 0.93 | 0.74 | 0.76 | 0.92   |
| 9-126701707 | 126701707 | C | G | 0.038 | 0.035 | 0.031 | 1.95 | 0.0041 | 0.97 | 0.68 | 0.84 | 0.67 | 0.55 | 0.58 | 0.15 | 0.18 | 0.08 | 0.0086 |
| 9-126701763 | 126701763 | C | T | 0.142 | 0.206 | 0.187 | 1.09 | 0.38   | 0.98 | 0.12 | 0.08 | 0.86 | 0.09 | 0.10 | 0.90 | 0.65 | 0.63 | 0.83   |
| 9-126701879 | 126701879 | G | C | 0.038 | 0.035 | 0.031 | 1.96 | 0.004  | 0.97 | 0.68 | 0.84 | 0.66 | 0.55 | 0.58 | 0.15 | 0.18 | 0.08 | 0.0084 |
| 9-126705780 | 126705780 | C | T | 0.038 | 0.035 | 0.033 | 1.70 | 0.019  | 0.99 | 0.68 | 0.74 | 0.69 | 0.55 | 0.51 | 0.39 | 0.18 | 0.08 | 0.036  |
| 9-126714111 | 126714111 | T | C | 0.035 | 0.033 | 0.030 | 2.01 | 0.0031 | 0.97 | 0.65 | 0.69 | 0.52 | 0.50 | 0.47 | 0.12 | 0.17 | 0.06 | 0.0066 |
| 9-126730175 | 126730175 | G | T | 0.043 | 0.027 | 0.026 | 1.14 | 0.62   | 0.92 | 0.53 | 0.30 | 0.11 | 0.41 | 0.23 | 0.33 | 0.14 | 0.03 | 0.77   |
| 9-126731286 | 126731286 | T | C | 0.043 | 0.025 | 0.026 | 1.14 | 0.62   | 0.92 | 0.53 | 0.33 | 0.11 | 0.41 | 0.25 | 0.32 | 0.14 | 0.02 | 0.77   |
| 9-126733261 | 126733261 | A | C | 0.043 | 0.027 | 0.026 | 1.14 | 0.61   | 0.93 | 0.53 | 0.30 | 0.12 | 0.41 | 0.23 | 0.34 | 0.14 | 0.03 | 0.76   |
| 9-126738469 | 126738469 | A | G | 0.043 | 0.027 | 0.026 | 1.15 | 0.6    | 0.92 | 0.53 | 0.30 | 0.13 | 0.41 | 0.23 | 0.35 | 0.14 | 0.03 | 0.75   |
| 9-126741408 | 126741408 | G | A | 0.043 | 0.027 | 0.028 | 1.34 | 0.28   | 0.78 | 0.53 | 0.30 | 0.21 | 0.41 | 0.23 | 0.69 | 0.14 | 0.03 | 0.40   |
| 9-126741544 | 126741544 | A | G | 0.043 | 0.027 | 0.028 | 1.34 | 0.28   | 0.78 | 0.53 | 0.30 | 0.21 | 0.41 | 0.23 | 0.69 | 0.14 | 0.03 | 0.40   |
| 9-126741659 | 126741659 | G | A | 0.043 | 0.027 | 0.028 | 1.34 | 0.28   | 0.78 | 0.53 | 0.30 | 0.21 | 0.41 | 0.23 | 0.69 | 0.14 | 0.03 | 0.40   |
| 9-126741908 | 126741908 | A | G | 0.043 | 0.027 | 0.028 | 1.34 | 0.28   | 0.78 | 0.53 | 0.30 | 0.21 | 0.41 | 0.23 | 0.69 | 0.14 | 0.03 | 0.40   |
| 9-126742505 | 126742505 | G | A | 0.043 | 0.025 | 0.026 | 1.14 | 0.61   | 0.91 | 0.53 | 0.33 | 0.12 | 0.41 | 0.25 | 0.34 | 0.14 | 0.02 | 0.76   |
| 9-126742752 | 126742752 | A | G | 0.043 | 0.027 | 0.026 | 1.15 | 0.61   | 0.92 | 0.53 | 0.30 | 0.13 | 0.41 | 0.23 | 0.35 | 0.14 | 0.03 | 0.75   |
| 9-126743270 | 126743270 | A | T | 0.043 | 0.027 | 0.026 | 1.15 | 0.61   | 0.92 | 0.53 | 0.30 | 0.13 | 0.41 | 0.23 | 0.35 | 0.14 | 0.03 | 0.75   |
| 9-126743900 | 126743900 | T | C | 0.043 | 0.027 | 0.026 | 1.15 | 0.61   | 0.92 | 0.53 | 0.30 | 0.13 | 0.41 | 0.23 | 0.35 | 0.14 | 0.03 | 0.76   |
| 9-126744131 | 126744131 | C | T | 0.043 | 0.027 | 0.029 | 1.33 | 0.29   | 0.79 | 0.53 | 0.30 | 0.20 | 0.41 | 0.23 | 0.67 | 0.14 | 0.03 | 0.41   |
| 9-126744531 | 126744531 | T | C | 0.043 | 0.027 | 0.026 | 1.15 | 0.61   | 0.92 | 0.53 | 0.30 | 0.13 | 0.41 | 0.23 | 0.35 | 0.14 | 0.03 | 0.75   |
| 9-126744952 | 126744952 | A | G | 0.043 | 0.027 | 0.026 | 1.15 | 0.61   | 0.92 | 0.53 | 0.30 | 0.13 | 0.41 | 0.23 | 0.35 | 0.14 | 0.03 | 0.75   |
| 9-126745532 | 126745532 | T | C | 0.043 | 0.027 | 0.026 | 1.15 | 0.61   | 0.92 | 0.53 | 0.30 | 0.13 | 0.41 | 0.23 | 0.35 | 0.14 | 0.03 | 0.75   |
| 9-126745697 | 126745697 | A | G | 0.043 | 0.027 | 0.026 | 1.15 | 0.61   | 0.92 | 0.53 | 0.30 | 0.13 | 0.41 | 0.23 | 0.35 | 0.14 | 0.03 | 0.75   |
| 9-126747237 | 126747237 | T | C | 0.043 | 0.025 | 0.026 | 1.14 | 0.62   | 0.91 | 0.53 | 0.33 | 0.12 | 0.41 | 0.25 | 0.34 | 0.14 | 0.02 | 0.76   |
| 9-126748298 | 126748298 | C | T | 0.043 | 0.025 | 0.026 | 1.14 | 0.62   | 0.91 | 0.53 | 0.33 | 0.12 | 0.41 | 0.25 | 0.34 | 0.14 | 0.02 | 0.76   |
| 9-126748672 | 126748672 | C | G | 0.043 | 0.025 | 0.026 | 1.14 | 0.62   | 0.91 | 0.53 | 0.33 | 0.12 | 0.41 | 0.25 | 0.34 | 0.14 | 0.02 | 0.76   |

---

|             |           |   |   |       |       |       |      |      |      |      |      |      |      |      |      |      |      |      |
|-------------|-----------|---|---|-------|-------|-------|------|------|------|------|------|------|------|------|------|------|------|------|
| 9-126749775 | 126749775 | A | T | 0.043 | 0.025 | 0.026 | 1.14 | 0.62 | 0.91 | 0.53 | 0.33 | 0.12 | 0.41 | 0.25 | 0.34 | 0.14 | 0.02 | 0.76 |
| 9-126750359 | 126750359 | T | C | 0.043 | 0.027 | 0.028 | 1.06 | 0.83 | 0.93 | 0.53 | 0.30 | 0.08 | 0.41 | 0.23 | 0.23 | 0.14 | 0.03 | 0.98 |
| 9-126750903 | 126750903 | G | C | 0.043 | 0.027 | 0.027 | 1.06 | 0.81 | 0.92 | 0.53 | 0.30 | 0.08 | 0.41 | 0.23 | 0.25 | 0.14 | 0.03 | 0.96 |
| 9-126751831 | 126751831 | T | G | 0.043 | 0.027 | 0.028 | 1.06 | 0.82 | 0.93 | 0.53 | 0.30 | 0.08 | 0.41 | 0.23 | 0.23 | 0.14 | 0.03 | 0.97 |
| 9-126751921 | 126751921 | T | C | 0.043 | 0.027 | 0.028 | 1.06 | 0.82 | 0.93 | 0.53 | 0.30 | 0.08 | 0.41 | 0.23 | 0.23 | 0.14 | 0.03 | 0.97 |
| 9-126753312 | 126753312 | T | C | 0.043 | 0.027 | 0.028 | 1.06 | 0.81 | 0.93 | 0.53 | 0.30 | 0.08 | 0.41 | 0.23 | 0.24 | 0.14 | 0.03 | 0.96 |
| 9-126757541 | 126757541 | T | G | 0.043 | 0.025 | 0.025 | 1.15 | 0.60 | 0.89 | 0.53 | 0.33 | 0.17 | 0.41 | 0.25 | 0.42 | 0.14 | 0.02 | 0.74 |
| 9-126791997 | 126791997 | A | C | 0.033 | 0.000 | 0.001 | 4.51 | 0.50 | 0.15 | 0.53 | 1.00 | 0.92 | 0.46 | 1.00 | 0.81 | 0.14 | 1.00 | 0.59 |

---

## References

- (1) Welt CK, Gudmundsson JA, Arason G, Adams J, Palsdottir H, Gudlaugsdottir G, Ingadottir G, Crowley WF. 2006 Characterizing Discrete Subsets of Polycystic Ovary Syndrome as Defined by the Rotterdam Criteria: The Impact of Weight on Phenotype and Metabolic Features. *J Clin Endocrinol Metab* 91:4842-4848.
- (2) Welt CK, Arason G, Gudmundsson JA, Adams JM, Palsdottir H, Gudlaugsdottir G, Ingadottir G, Crowley Jr WF. 2006 Defining constant versus variable phenotypic features of women with polycystic ovary syndrome using different ethnic groups and populations. *J Clin Endocrinol Metab* 91:4361-4368.
- (3) Ehrmann DA, Liljenquist DR, Kasza K, Azziz R, Legro RS, Ghazzi MN. 2006 Prevalence and Predictors of the Metabolic Syndrome in Women with Polycystic Ovary Syndrome (PCOS). *J Clin Endocrinol Metab* 91:48-53.
- (4) 1000 Genomes Project Consortium. A map of human genome variation from population-scale sequencing. *Nature*. 2010 Oct 28;467(7319) : 1061-73.
- (5) Chen ZJ, Zhao H, He L, Shi Y, Qin Y, Shi Y, Li Z, You L, Zhao J, Liu J, Liang X, Zhao X, Zhao J, Sun Y, Zhang B, Jiang H, Zhao D, Bian Y, Gao X, Geng L, Li Y, Zhu D, Sun X, Xu JE, Hao C, Ren CE, Zhang Y, Chen S, Zhang W, Yang A, Yan J, Li Y, Ma J, Zhao Y. 2011 Genome-wide association study identifies susceptibility loci for polycystic ovary syndrome on chromosome 2p16.3, 2p21 and 9q33.3. *Nat Genet* 43:55-59.
- (6) J. Marchini, B. Howie, S. Myers, G. McVean and P. Donnelly (2007) A new multipoint method for genome-wide association studies via imputation of genotypes. *Nature Genetics* 39 : 906-913.
